# Supplementary material for: Swieteliacates S–U, phragmalin limonoids, from the leaves of Swietenia macrophylla
Source: Royal Society of Chemistry journal article supplement (doi:10.1039/d3ob02113k), 2024-01-01
Supplement: d3ob02113k1.pdf [file d3ob02113k1.pdf]

1 **Supporting Information**

2 **Swieteliacates S-U, phragmalin limonoids from the leaves of *Swietenia***  
3 ***macrophylla***

4 Yun-Peng Sun <sup>a,1</sup>, Zhe Xie<sup>a,1</sup>, Wen-Fang Jin<sup>a</sup>, Ying-Wei Liu<sup>b</sup>, Li-Juan Sun<sup>b</sup>, Jin-Song Liu<sup>a, c\*</sup>, Guo-  
5 Kai Wang<sup>a, c\*</sup>

6 <sup>a</sup> *School of Pharmacy, Anhui University of Chinese Medicine, Hefei 230012, P.R. China*

7 <sup>b</sup> *National & Local Joint Engineering Research Center of High-throughput Drug Screening*

8 *Technology, Hubei Province Key Laboratory of Biotechnology of Chinese Traditional Medicine,*

9 *State key laboratory of biocatalysis and enzyme engineering, Hubei University, Wuhan 430062,*

10 *PR China*

11 <sup>c</sup> *Anhui Province Key Laboratory of Research & Development of Chinese Medicine, Hefei*

12 *230012, P.R. China*

13

14

15 \*Corresponding authors.

16 Tel./fax: +86 551 68129167 (J.-S. Liu); +86 551 68129123 (G.-K. Wang).

17 E-mail addresses: jinsongliu@ahtcm.edu.cn (J.-S. Liu); wanggk@ahtcm.edu.cn (G.-K. Wang)

18

19 <sup>1</sup> The authors contributed equally to this work.

## Table of Contents

|                                                            |    |
|------------------------------------------------------------|----|
| 1. <b>Supplementary Figures</b> .....                      | 3  |
| 2. <b>Biological assays</b> .....                          | 10 |
| 3. <b>ECD Computational details of compounds</b> .....     | 12 |
| 4. <b>Original spectra of compound</b> .....               | 17 |
| NMR, MS, ORD, UV and CD spectra of compound <b>1</b> ..... | 17 |
| NMR, MS, ORD, UV and CD spectra of compound <b>2</b> ..... | 22 |
| NMR, MS, ORD, UV and CD spectra of compound <b>3</b> ..... | 27 |

## 1. Supplementary Figures

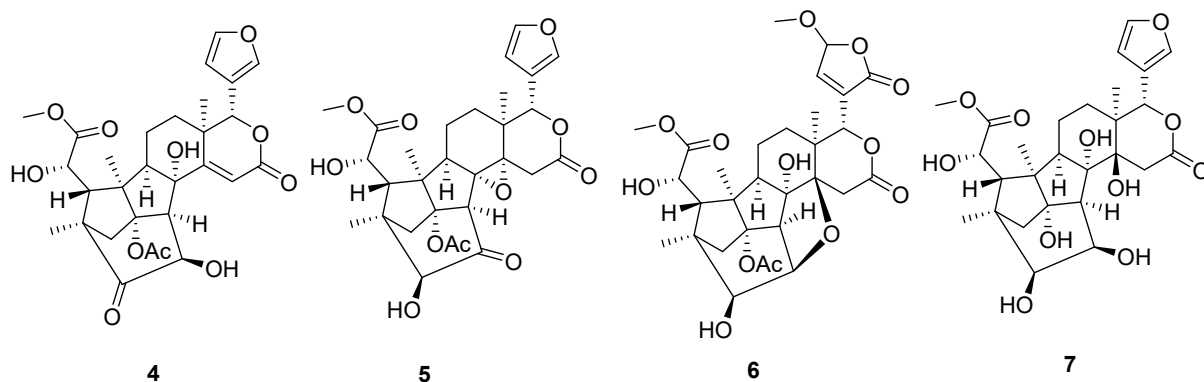

**Figure S1.1.** Structures of compounds (4-7) isolated from *S. macrophylla*.

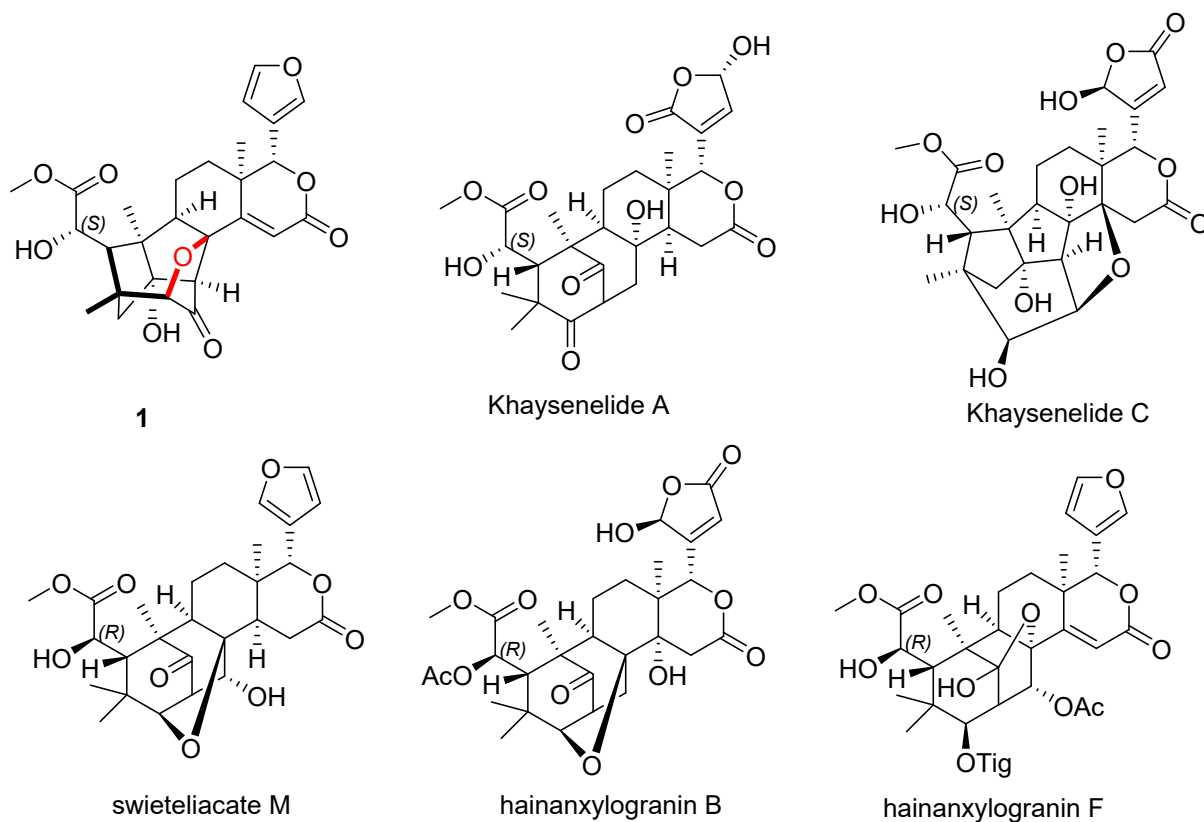

**Figure S1.2.** Structures of **1** and swieteliacate M<sup>1</sup> isolated from *S. macrophylla*, khaysenelides A and C isolated from *Khaya senegalensis*<sup>2</sup>, hainanxylogranins B and F isolated from *Xylocarpus granatum*<sup>3</sup>.

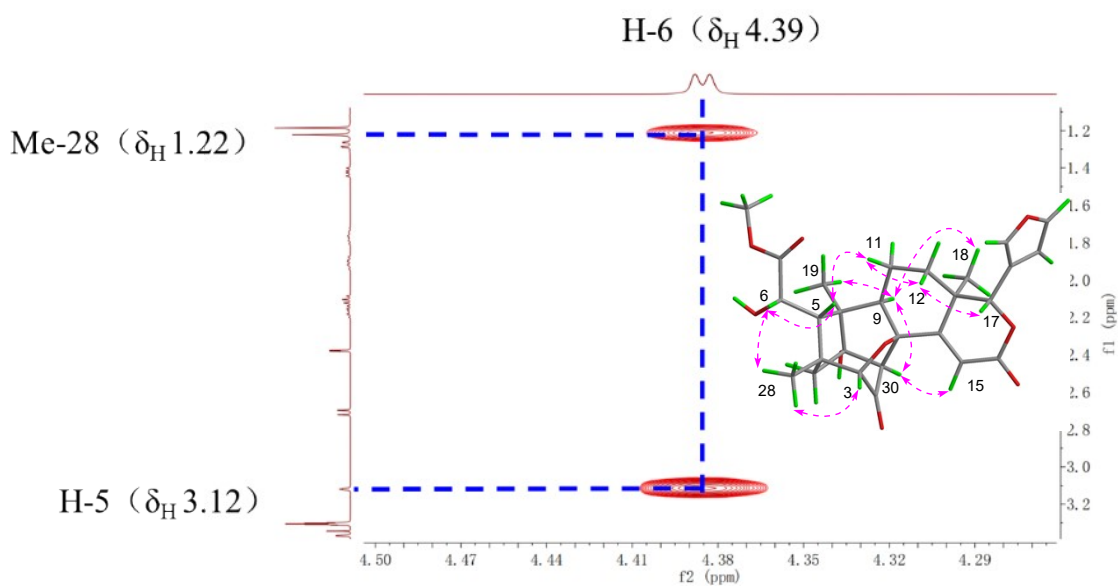

**Figure S1.3** Key ROESY correlations of compound **1**

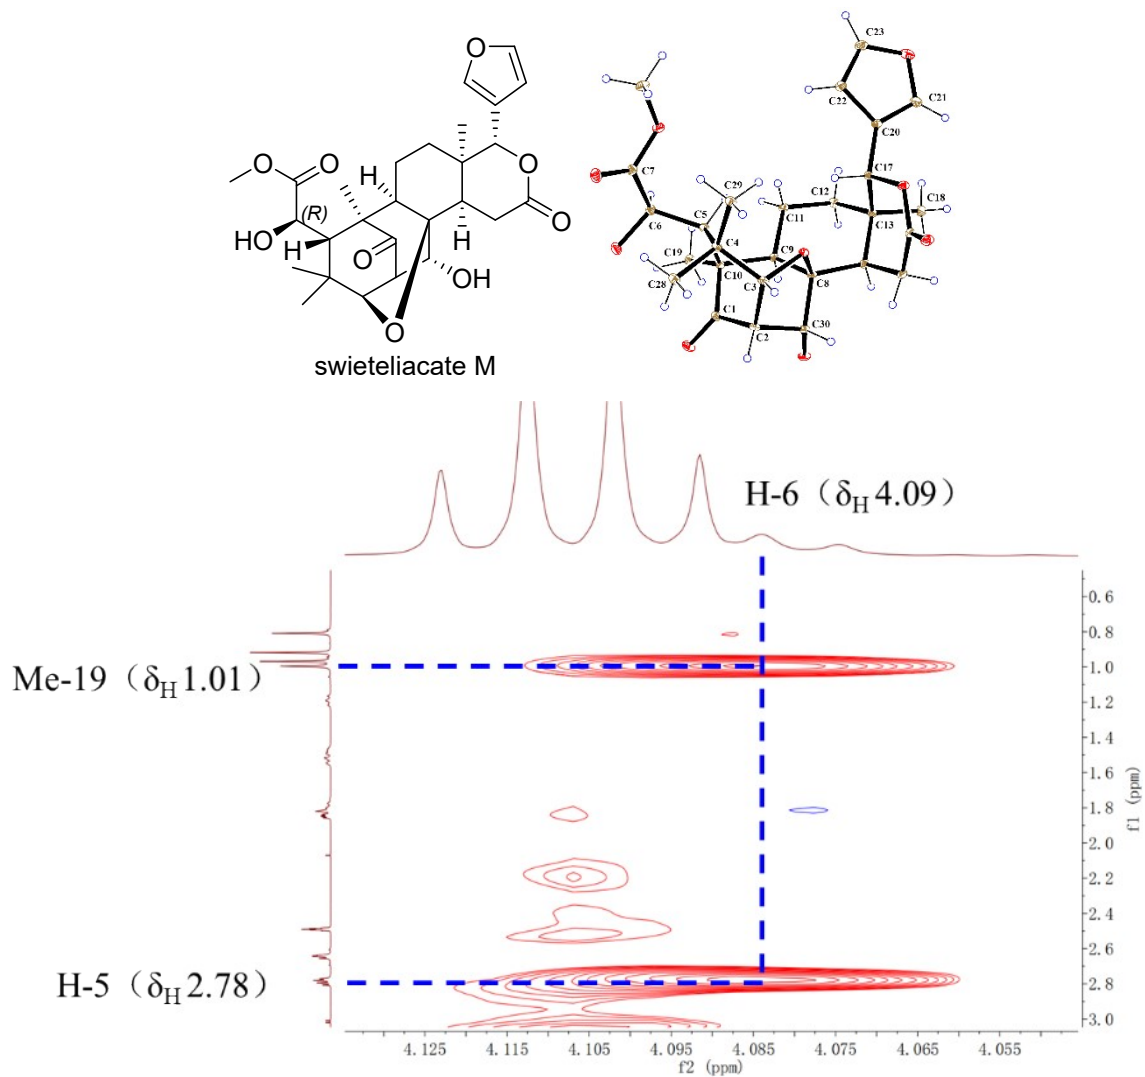

**Figure S1.4** X-ray structure and key ROESY correlations of swieteliacate M

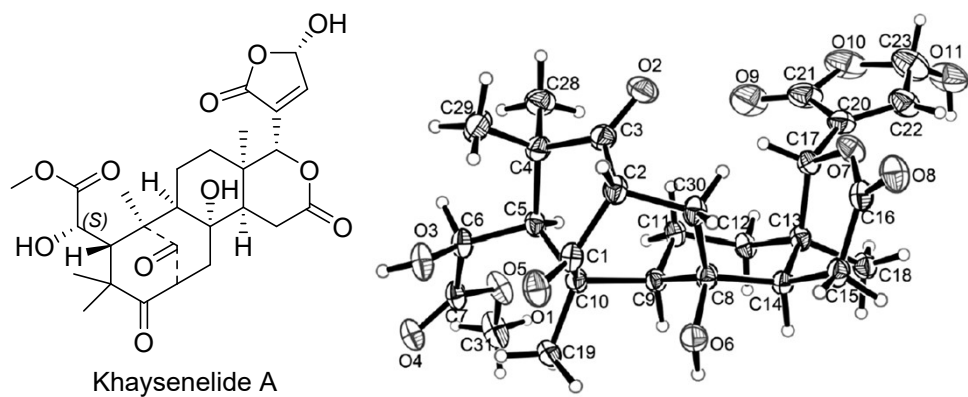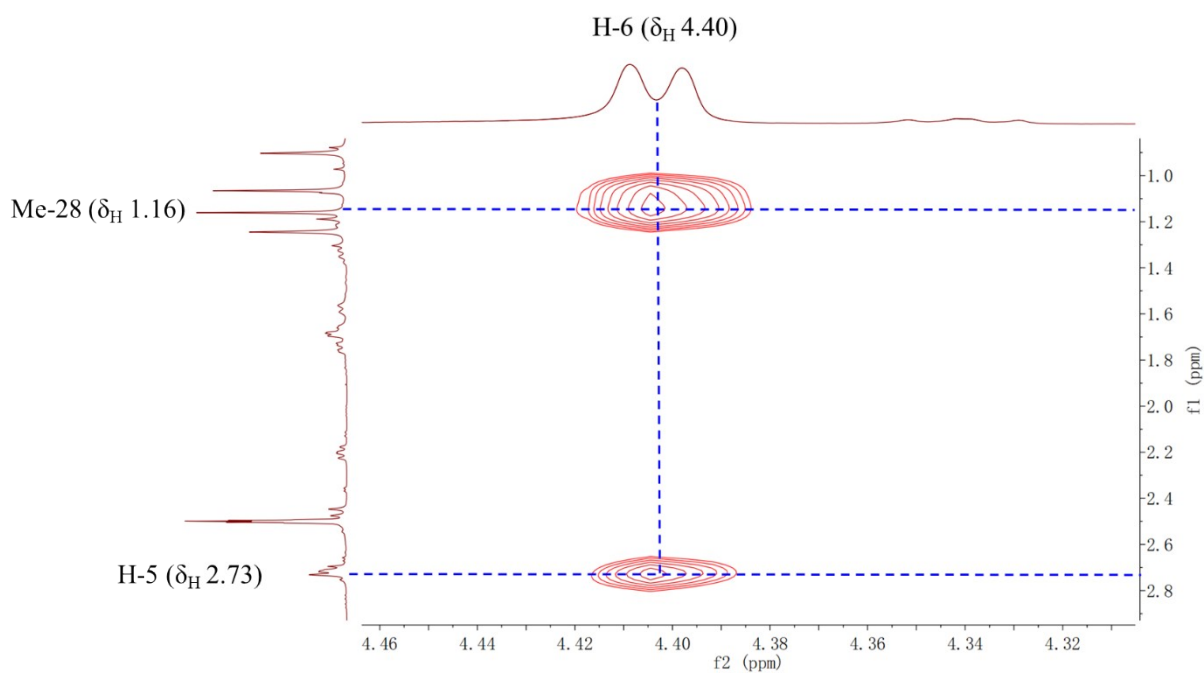

**Figure S1.5** X-ray structure and key ROESY correlations of khaysenelide A

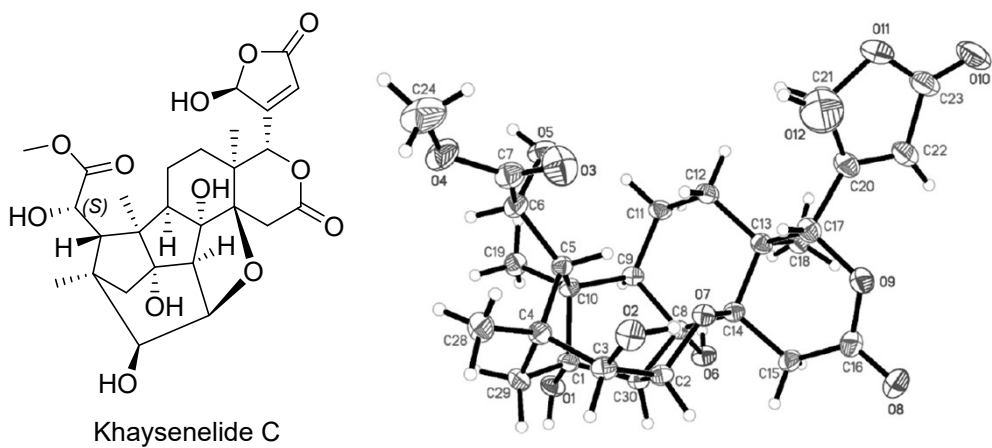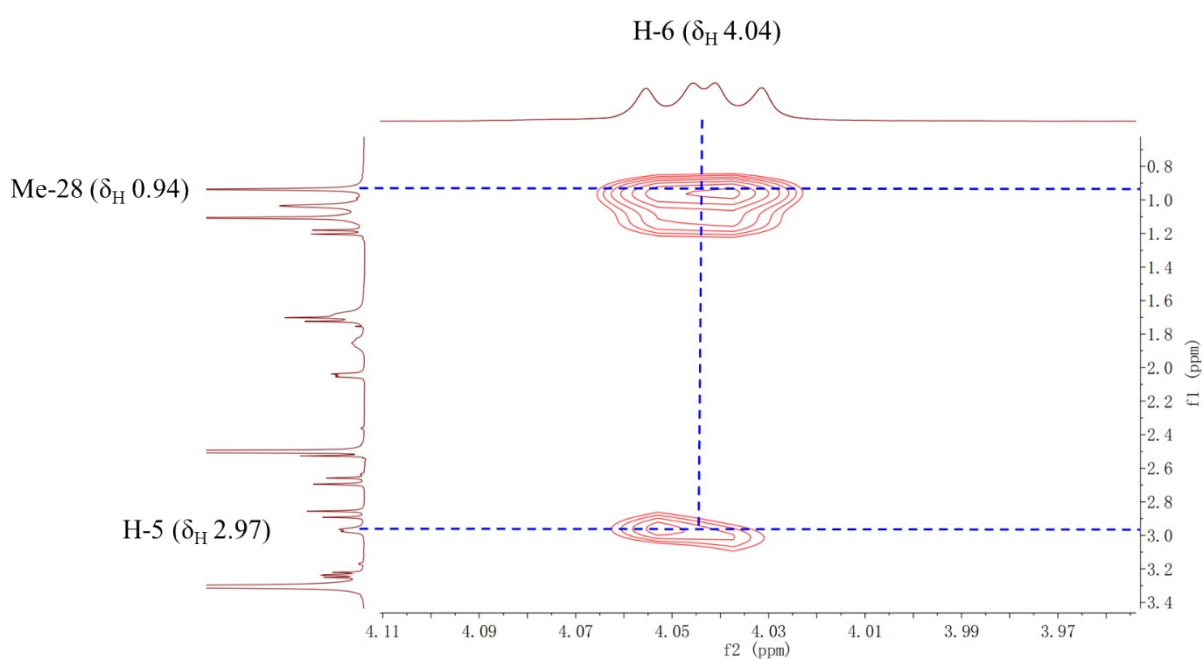

**Figure S1.6** X-ray structure and key ROESY correlations of khaysenelide C

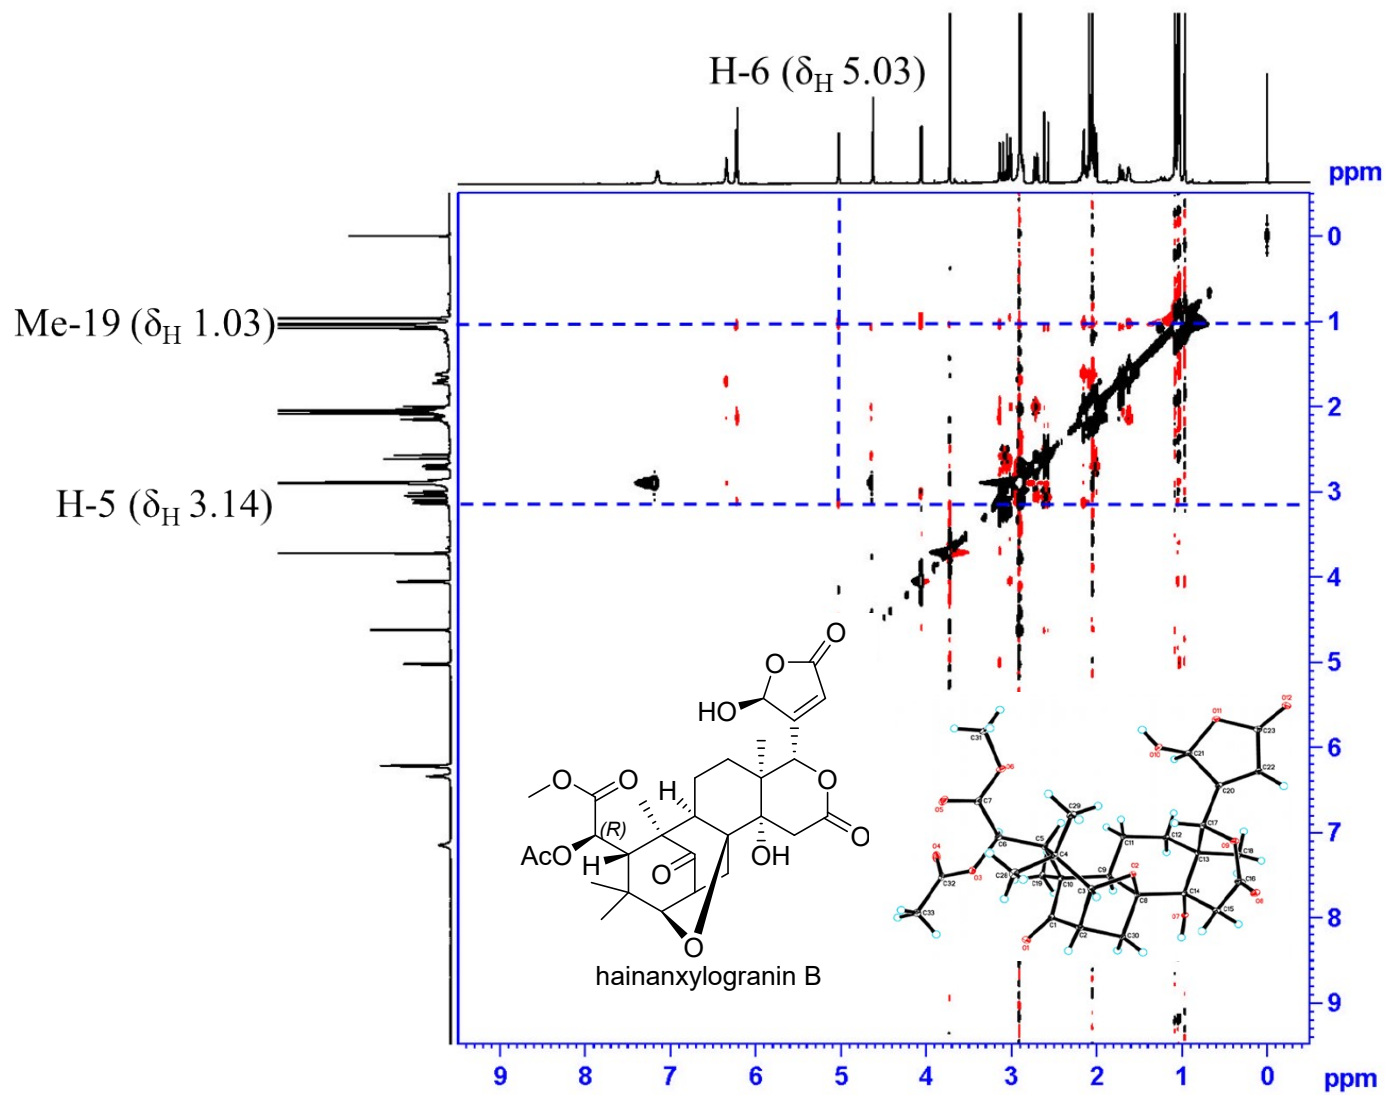

**Figure S1.7** X-ray structure and key ROESY correlations of hainanxylogranin B

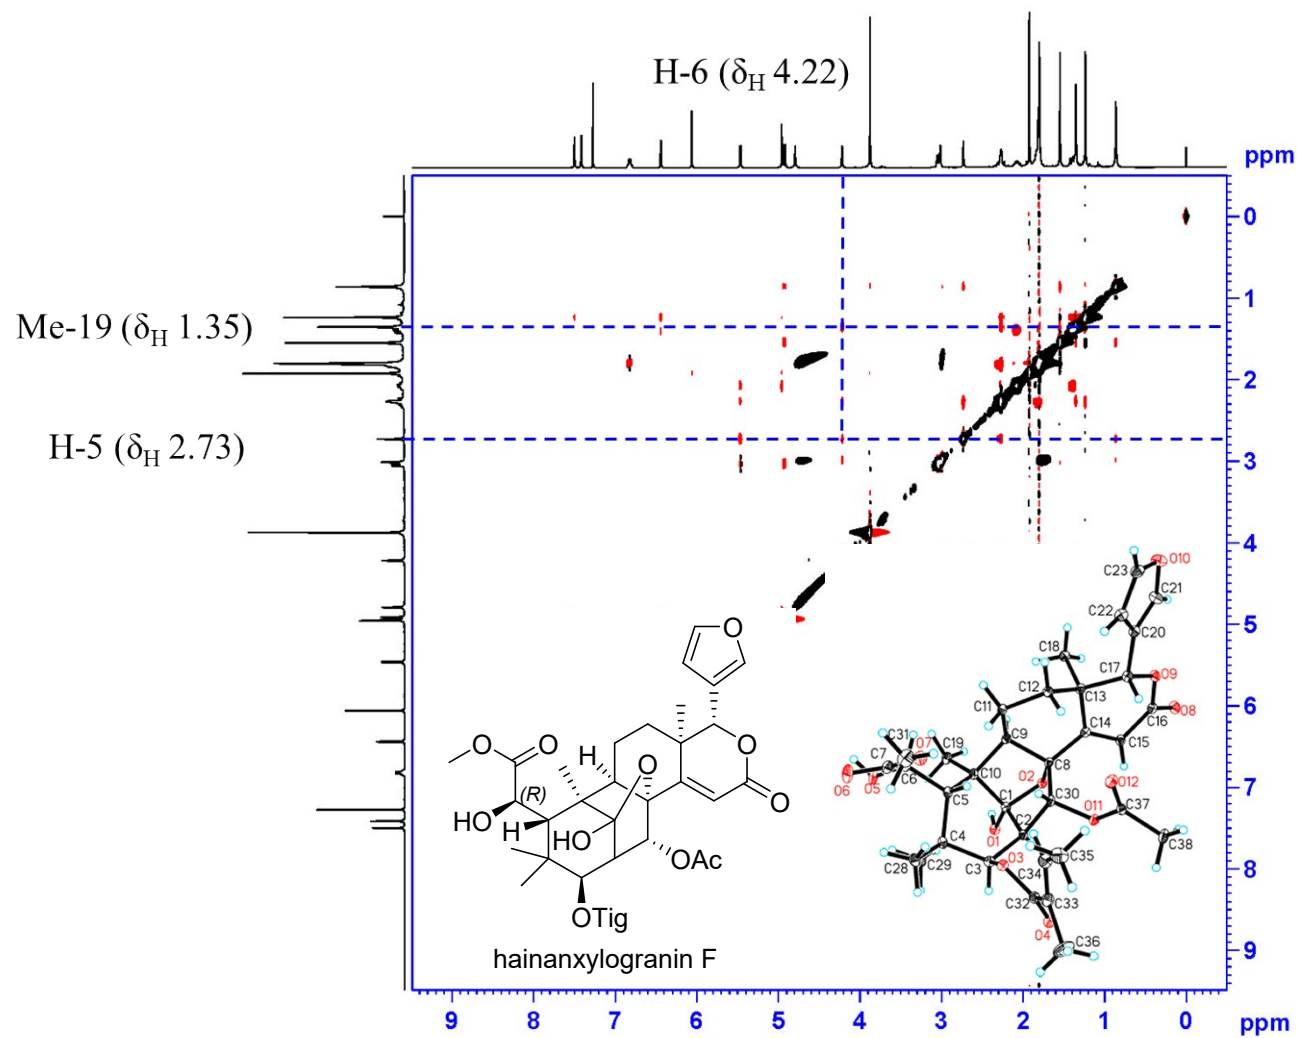

**Figure S1.8** X-ray structure and key ROESY correlations of hainanxylogranin F



## References

- [1] G.-K. Wang, Y.-P. Sun, W.-F. Jin, Y. Yu, J.-Y. Zhu and J.-S. Liu, *Bioorg. Chem.* 2022, **123**, 105780
- [2] Y. Li, Q. P Lu, J. Luo, J. S. Wang, X. B. Wang, M. D. Zhu and L. Y. Kong, *Chem. Pharm. Bull.* 2015, **63**, 305–310.
- [3] J. C. Zhang, Q. Liao, L. Shen and J. Wu, *Bioorg. Chem.* 2020, **100**, 103903.

## **2. Biological assays**

### ***2.1 Cell culture***

Hep G2 cells were resuscitated, passaged and stabilized to a density of 80 % for subsequent experiments.

Male C57/BL6J mice aged 7-8 weeks were selected. Following weighing, intraperitoneal injection of Amobarbital sodium was administered for anesthesia. The abdominal cavity was opened to expose the liver, and the inferior vena cava was incised. Sequential perfusion of the liver was achieved through the portal vein using heparin sodium solution, Krebs-Ringer buffer containing EGTA, and Krebs-Ringer buffer containing CaCl<sub>2</sub> and collagenase I. The liver was collected, filtered through a 70 μm cell strainer, and centrifuged at 4 °C and 50 ×g. The liver pellet was resuspended in pre-cooled RPMI 1640 medium, centrifuged, and the supernatant was discarded and repeated twice. The suspended cells were then seeded into a well plate at an appropriate density using 1640 culture medium containing 10% FBS, obtaining mouse primary hepatocytes (MPH). The protocols and materials for animal experiments adhered to the 'Animal Research: Reporting In Vivo Experiments' (ARRIVE) 2.0 guidelines and received approval from the Institutional Animal Care and Use Committee of Hubei University (Protocol No: 20220048).

### ***2.2 Hepatocyte glucose production (HGP) assay***

MPH were seeded in a 6-well plate, and upon stabilization of cellular status, the medium was immediately replaced with sugar-free culture medium. The final concentrations of substrates for hepatic gluconeogenesis, such as sodium pyruvate and sodium lactate, were set at 2 mM and 20 mM, respectively. Cells were co-incubated with 30 μM FSK and 1 μM Dex to induce gluconeogenesis. After a 12 h co-incubation with limonoids (40 μM), glucose content in the supernatant culture medium was measured, and protein quantification was performed. Metformin (2 mM) served as a positive control.<sup>1</sup>

### **2.3 Cellular TG analysis**

HepG2 cells were inoculated in 6-well plates, and treated with FFAs and limonoids (40  $\mu$ M) for 24 h. Intracellular TG levels were measured using a TG assay kit according to the manufacturer's recommendation. The protein concentration in each well was measured by a BCA protein assay kit to standardize the data.<sup>2</sup>

### **References**

- [1] L. Logie, Z. Lee, J. W. Allwood, G. McDougall, C. Beall, G. Rena, *Diabetes, Obes. Metab.* 2018, 20, 2748–2758.
- [2] X. Y. Liu, M. Hu, C. Ye, L. H. Liao, C. Ding, L. J. Sun, J. C. Liang, Y. Chen, *Chem-Biol. Interact.* 2022, 368, 110250.

### 3. ECD Computational details of compounds

The initial conformational analysis of the compounds **1-3** were executed by employing Monte Carlo searching algorithm via the MMFF94 molecular mechanics force field,<sup>1</sup> with the aid of the SPARTAN'16 program package, leading to afford a panel of relatively favored conformations in an energy range of 3 kcal/mol above the global minimum. The force field minimum energy conformers thus obtained were subsequently optimized by applying the density functional theory (DFT) with the B3LYP/6-31G(d) level in vacuum, implemented in the Gaussian 09 software package.<sup>2</sup> Harmonic vibrational frequencies were also performed to confirm no imaginary frequencies of the finally optimized conformers. These predominant conformers were subjected to theoretical calculation of ECD by utilizing Time-dependent density functional theory (TDDFT) calculations at the B3LYP/6-311g (2d, p) level in MeOH using the Polarizable Continuum Model (PCM) solvent model. The energies, oscillator strengths, and rotational strengths of each conformers were carried out with Gaussian 09 software package. The theoretical calculations of ECD spectra for each conformer were then approximated by the Gaussian distribution. The final ECD spectrum of the individual conformers was summed up on the basis of Boltzmann-weighted population contribution by the SpecDisv1.64.<sup>3</sup>

**Table S3.1.** Energy analyses of conformers (1*S*,3*R*,4*R*,5*R*,6*S*,8*R*,9*R*,10*S*,13*R*,17*R*,30*S*)-**1a-f**

| NO. | 3D conformers                                                                       | Free energy  |                          |                           |
|-----|-------------------------------------------------------------------------------------|--------------|--------------------------|---------------------------|
|     |                                                                                     | E (Hartree)  | $\Delta E$<br>(Kcal/mol) | Boltzmann<br>distribution |
| 1a  | 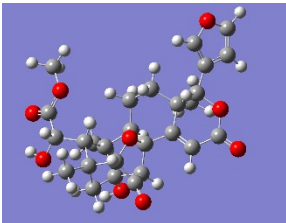 | -1722.131521 | 0.0000                   | 34.48%                    |

|    |                                                                                     |              |        |        |
|----|-------------------------------------------------------------------------------------|--------------|--------|--------|
| 1b | 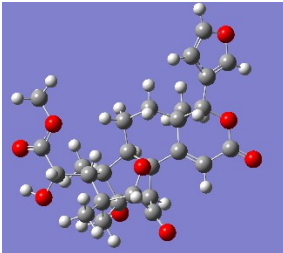   | -1722.130999 | 0.3275 | 19.83% |
| 1c |    | -1722.130904 | 0.3869 | 17.94% |
| 1d |    | -1722.130386 | 0.7118 | 10.36% |
| 1e |  | -1722.130344 | 0.7383 | 9.91%  |
| 1f |  | -1722.130081 | 0.9037 | 7.49%  |

**Table S3.2.** Energy analyses of conformers (1*S*,3*R*,4*R*,5*R*,6*S*,8*S*,9*R*,10*S*,13*R*,17*R*,30*S*)-2a-c

| NO. | 3D conformers                                                                       | Free energy  |                          |                           |
|-----|-------------------------------------------------------------------------------------|--------------|--------------------------|---------------------------|
|     |                                                                                     | E (Hartree)  | $\Delta E$<br>(Kcal/mol) | Boltzmann<br>distribution |
| 2a  | 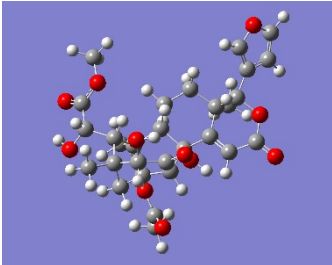 | -1951.002984 | 0.0000                   | 34.40%                    |

|    |                                                                                   |              |        |        |
|----|-----------------------------------------------------------------------------------|--------------|--------|--------|
| 2b | 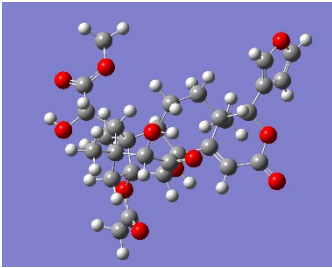 | -1951.002984 | 0.0000 | 34.40% |
| 2c |  | -1951.002874 | 0.0690 | 30.62% |

**Table S3.3.** Energy analyses of conformers (1*S*,3*R*,4*R*,5*R*,8*S*,9*R*,10*S*,13*R*,17*R*,30*S*)-**3a-f**

| NO. | 3D conformers                                                                       | Free energy  |                          |                           |
|-----|-------------------------------------------------------------------------------------|--------------|--------------------------|---------------------------|
|     |                                                                                     | E (Hartree)  | $\Delta E$<br>(Kcal/mol) | Boltzmann<br>distribution |
| 3a  | 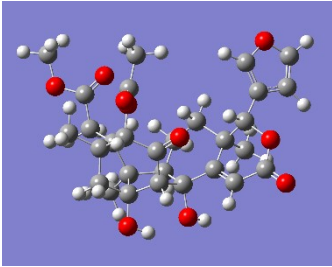 | -1875.851332 | 0.0000                   | 42.89%                    |
| 3b  |  | -1875.850901 | 0.2706                   | 27.16%                    |

|    |                                                                                     |              |        |        |
|----|-------------------------------------------------------------------------------------|--------------|--------|--------|
| 3c | 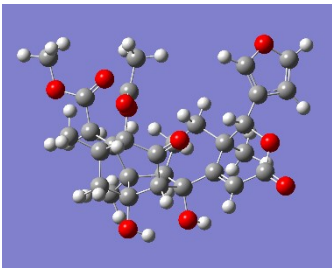   | -1875.849992 | 0.8410 | 10.36% |
| 3d |    | -1875.849922 | 0.8846 | 9.63%  |
| 3e |   | -1875.849483 | 1.1599 | 6.05%  |
| 3f |  | -1875.849071 | 1.4189 | 3.91%  |

## References

- [1] Halgren TA. *J Comput Chem*, 1999, **20**, 730-748.
- [2] Frisch MJ, Trucks GW, Schlegel H B, Scuseria GE, Robb MA, Cheeseman JR, Scalmani G, Barone V, Mennucci B, Petersson GA, Nakatsuji H, Caricato M, Li X, Hratchian H P, Izmaylov AF, Bloino J, Zheng G, Sonnenberg JL, Hada M, Ehara M, Toyota K, Fukuda R, Hasegawa J, Ishida M, Nakajima T, Honda Y, Kitao O, Nakai H, Vreven T, Montgomery Jr JA, Peralta JE, Ogliaro F, Bearpark M, Heyd JJ, Brothers E, Kudin KN, Staroverov VN, Kobayashi R, Normand J, Raghavachari K, Rendell A, Burant JC,

Iyengar SS, Tomasi J, Cossi M, Rega N, Millam JM, Klene M, Knox JE, Cross J B, Bakken V, Adamo C, Jaramillo J, Gomperts R, Stratmann RE, Yazyev O, Austin AJ, Cammi R, Pomelli C, Ochterski JW, Martin RL, Morokuma K, Zakrzewski VG, Voth GA, Salvador P, Dannenberg JJ, Dapprich S, Daniels AD, Farkas Ö, Foresman JB, Ortiz JV, Cioslowski J, Fox DJ, Gaussian 09, Rev. C 01; Gaussian, Inc., Wallingford CT, 2009.

[3] Bruhn T, Schaumloffel A, Hemberger Y, Bringmann G. *Chirality*, 2013, **25**, 243-24.



## 4. Original spectra of compound

### NMR, MS, ORD, UV and CD spectra of compound 1

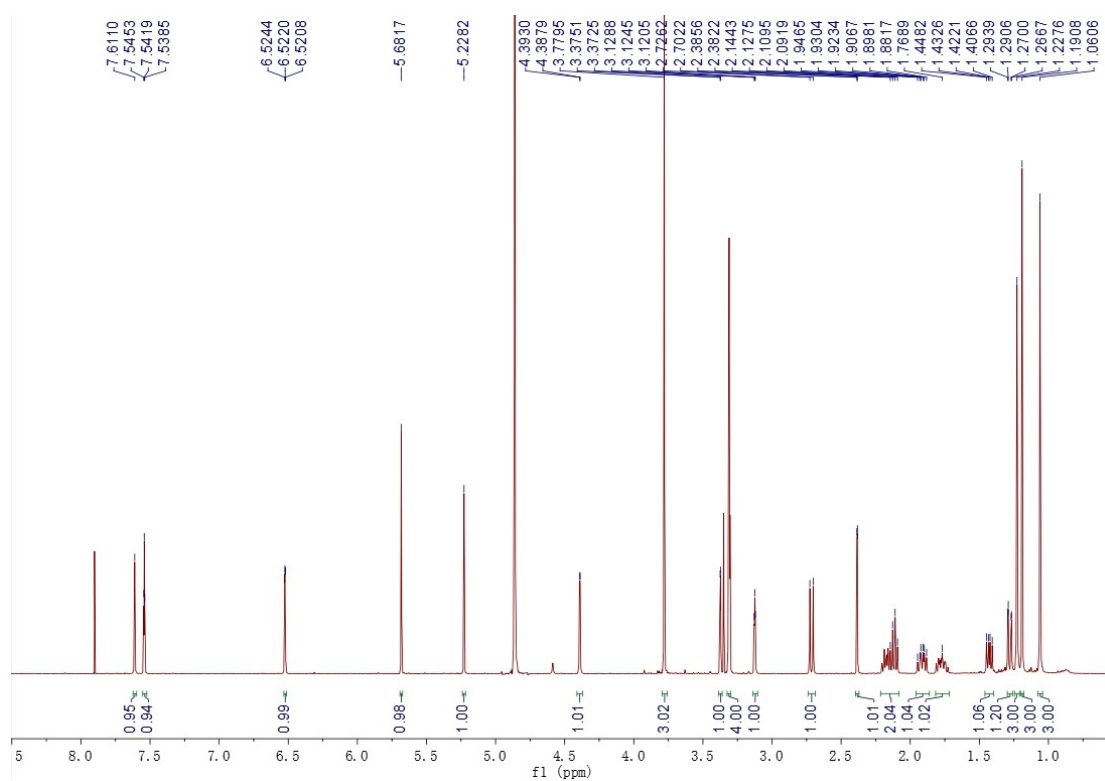

Figure 4.1.1. <sup>1</sup>H NMR spectrum of compound 1 in CD<sub>3</sub>OD

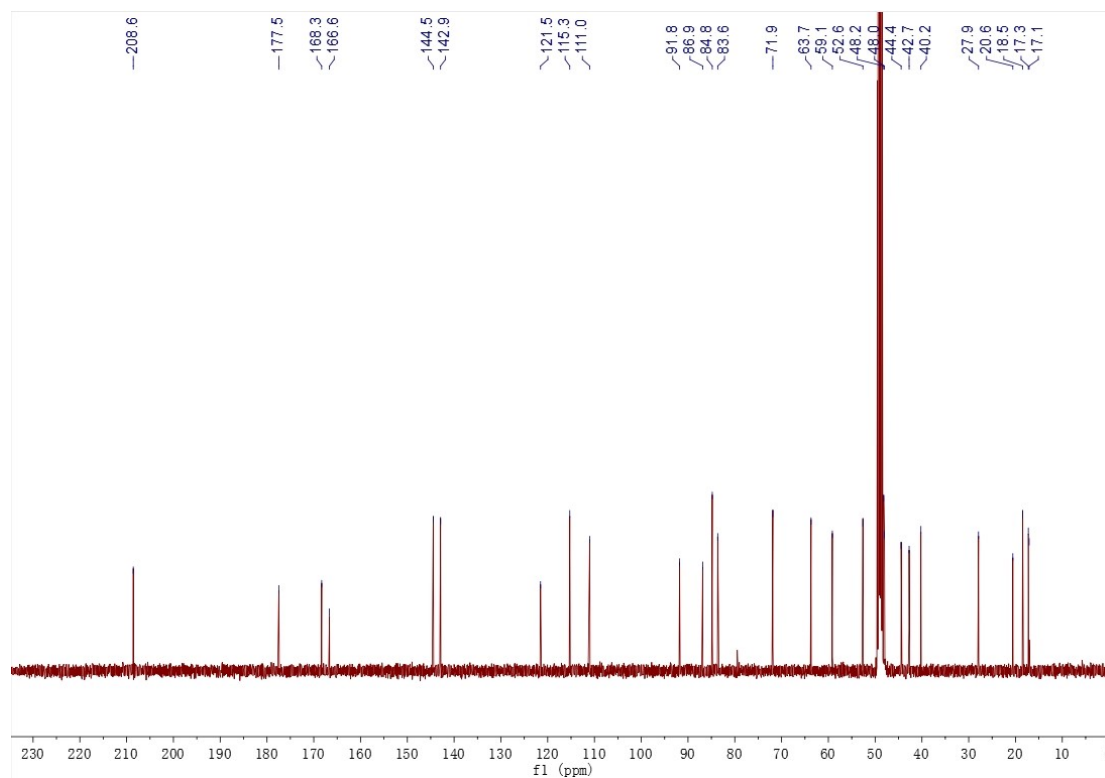

Figure 4.1.2. <sup>13</sup>C NMR spectrum of compound 1 in CD<sub>3</sub>OD

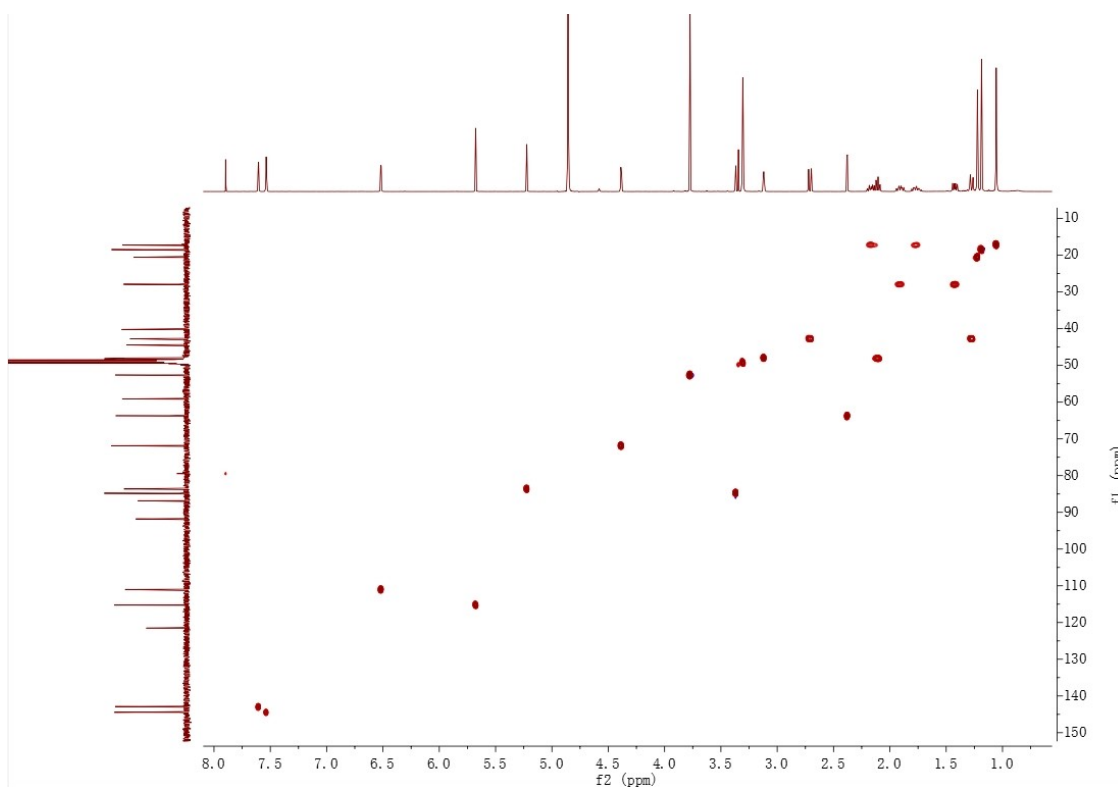

**Figure 4.1.3.** HSQC spectrum of compound **1** in CD<sub>3</sub>OD

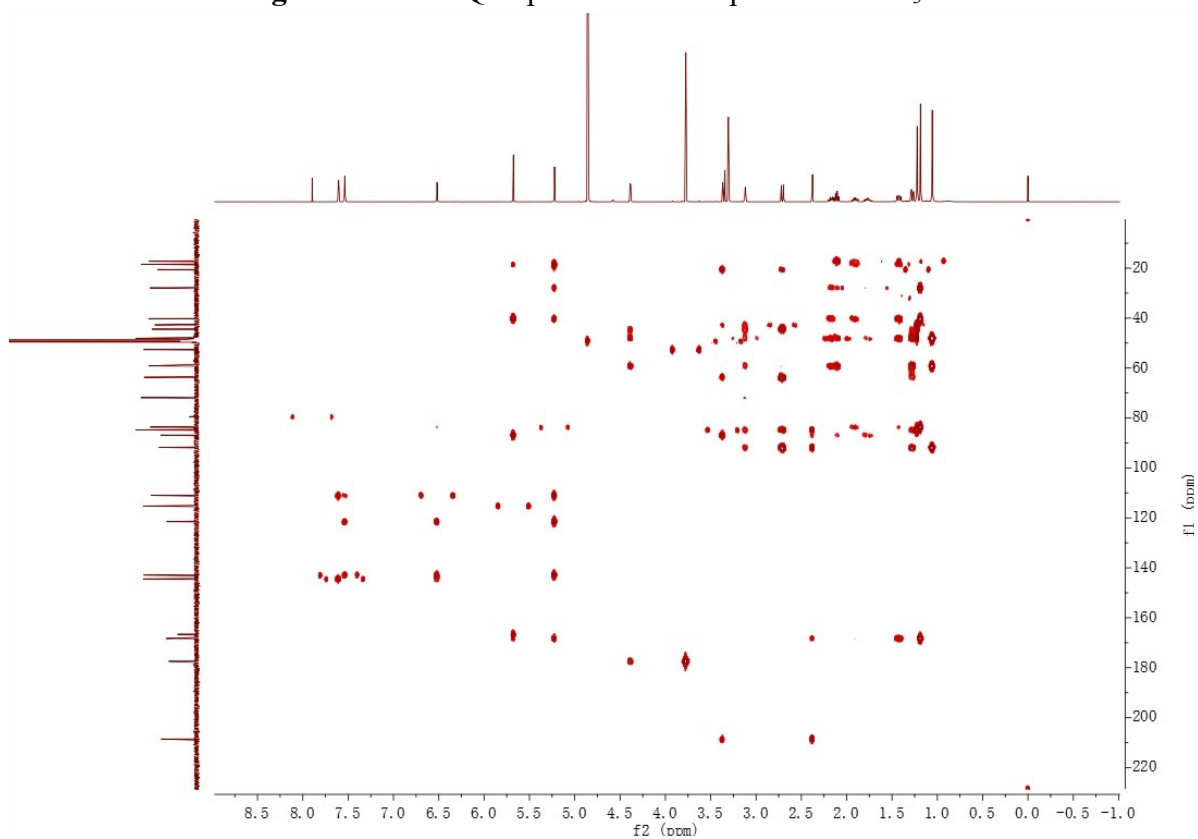

**Figure 4.1.4.** HMBC spectrum of compound **1** in CD<sub>3</sub>OD

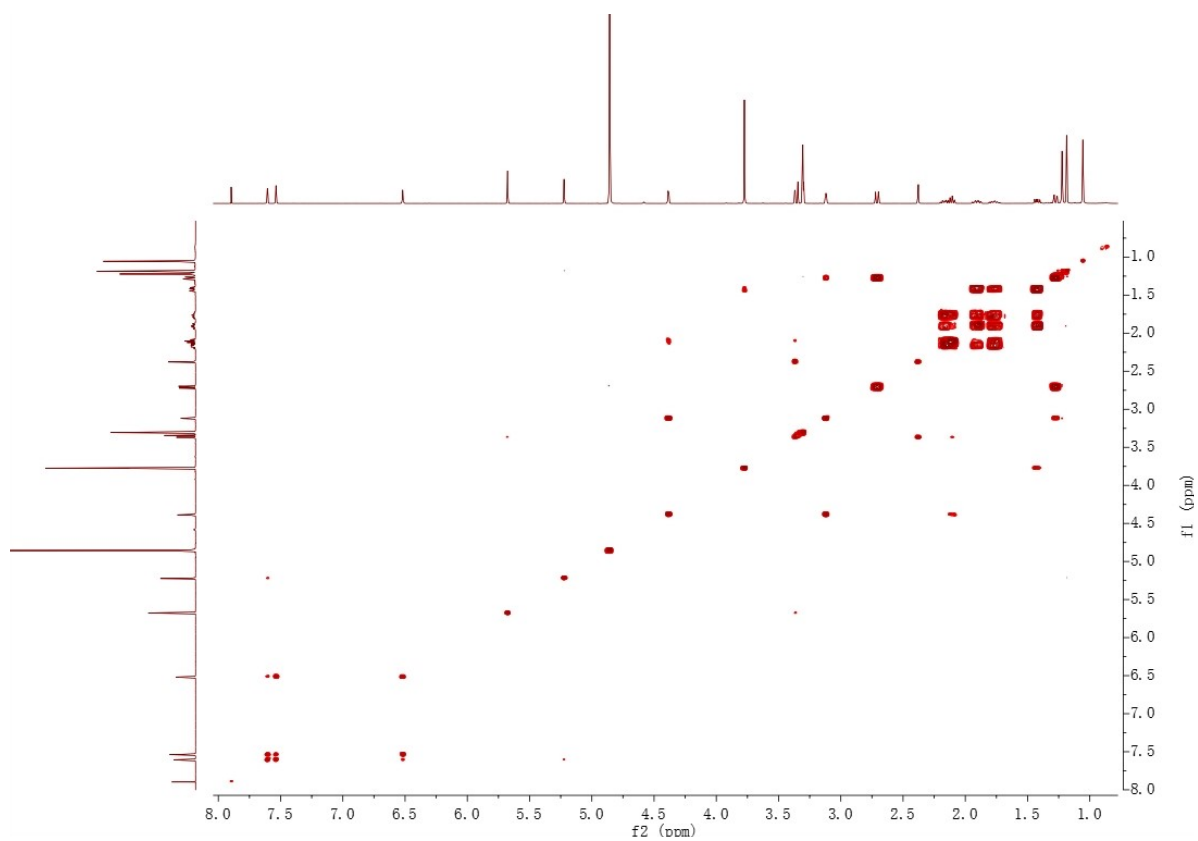

**Figure 4.1.5.**  $^1\text{H}$ - $^1\text{H}$  COSY spectrum of compound **1** in  $\text{CD}_3\text{OD}$

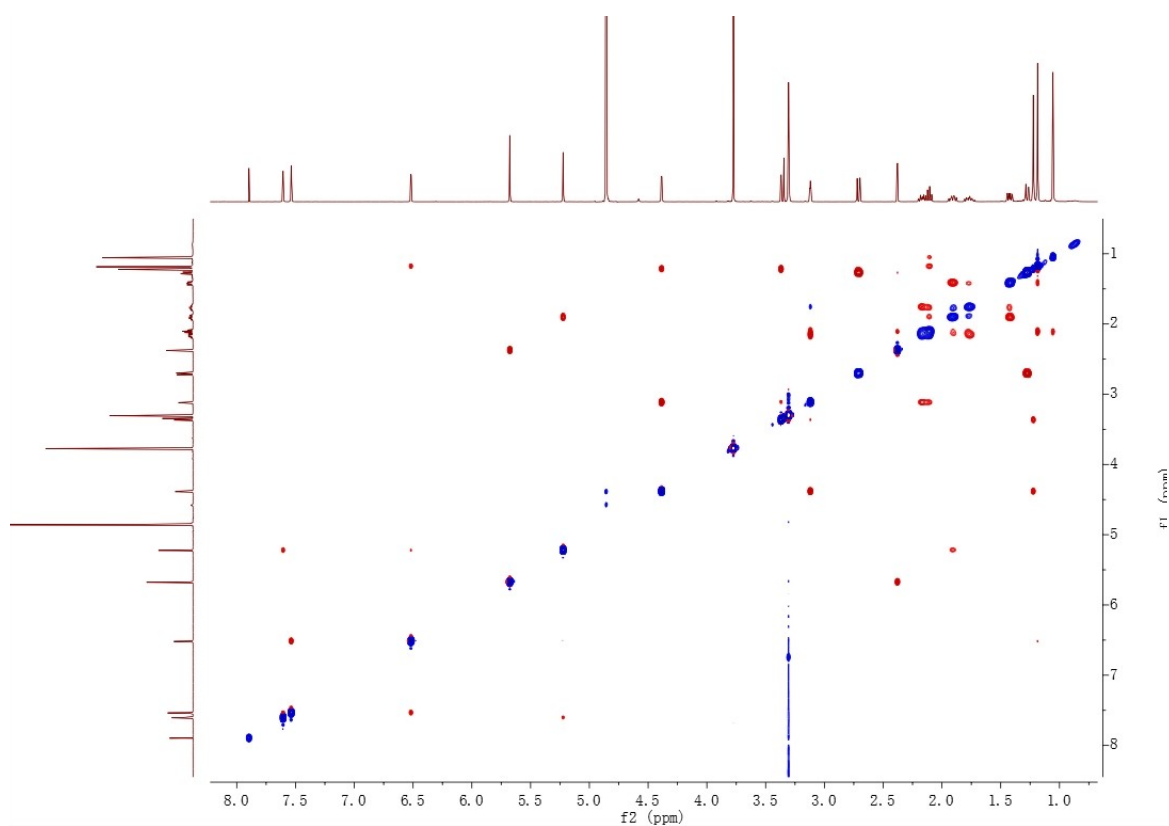

**Figure 4.1.6.** ROESY spectrum of compound **1** in  $\text{CD}_3\text{OD}$

Data File: E:\DATA\2021\0118\wjy-67.lcd

| Elmt | Val. | Min | Max | Use Adduct |
|------|------|-----|-----|------|------|-----|-----|------|------|-----|-----|------|------|-----|-----|------------|
| H    | 1    | 10  | 100 | F    | 1    | 0   | 0   | S    | 2    | 0   | 0   | Br   | 1    | 0   | 0   | Na         |
| 2H   | 1    | 0   | 0   | Na   | 1    | 0   | 0   | Cl   | 1    | 0   | 0   | Pd   | 2    | 0   | 0   |            |
| C    | 4    | 5   | 50  | Mg   | 2    | 0   | 0   | Co   | 2    | 0   | 0   | Ag   | 1    | 0   | 0   |            |
| N    | 3    | 0   | 10  | Si   | 4    | 0   | 0   | Cu   | 2    | 0   | 0   | I    | 3    | 0   | 0   |            |
| O    | 2    | 0   | 30  | P    | 3    | 0   | 0   | Se   | 2    | 0   | 0   |      |      |     |     |            |

Error Margin (ppm): 5  
 HC Ratio: unlimited  
 Max Isotopes: all  
 MSn Iso RI (%): 75.00

DBE Range: -2.0 - 100.0  
 Apply N Rule: yes  
 Isotope RI (%): 1.00  
 MSn Logic Mode: OR

Electron Ions: both  
 Use MSn Info: yes  
 Isotope Res: 10000  
 Max Results: 20

Event#: 1 MS(E+) Ret. Time : 0.400 -&gt; 0.533 Scan# : 61 -&gt; 81

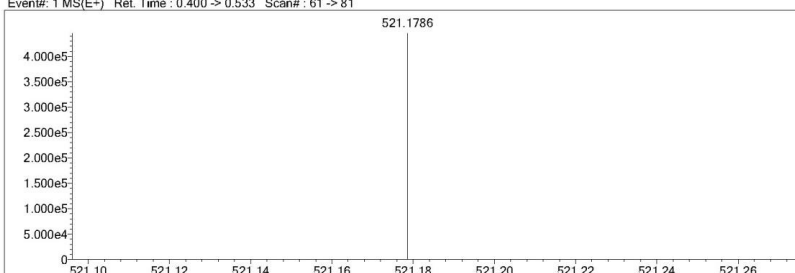

Measured region for 521.1786 m/z

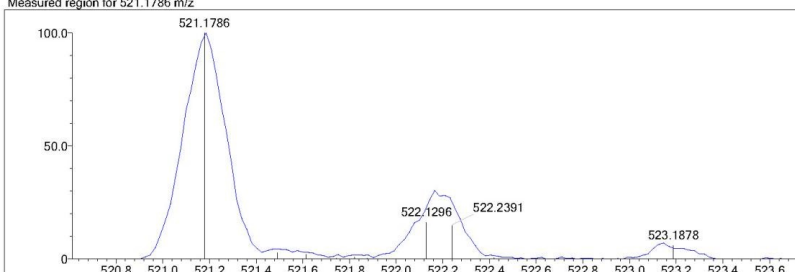

C27 H30 O9 [M+Na]+ : Predicted region for 521.1782 m/z

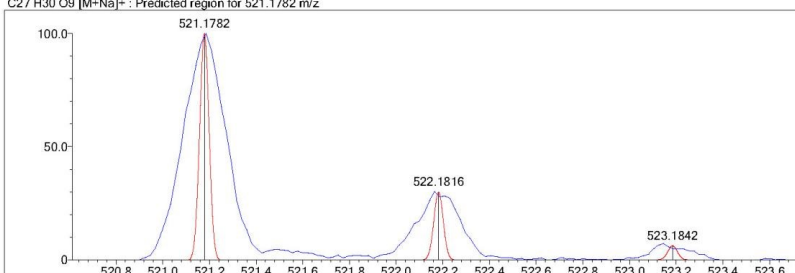

| Formula (M) | Ion     | Meas. m/z | Pred. m/z | Df. (mDa) | Df. (ppm) | DBE  |
|-------------|---------|-----------|-----------|-----------|-----------|------|
| C27 H30 O9  | [M+Na]+ | 521.1786  | 521.1782  | 0.4       | 0.77      | 13.0 |

Figure 4.1.7. HRESIMS spectrum of compound 1

**Rudolph Research Analytical**

This sample was measured on an Autopol VI, Serial #91058  
 Manufactured by Rudolph Research Analytical, Hackettstown, NJ, USA.

Measurement Date : Wednesday, 07-SEP-2022

Set Temperature : OFF

Time Delay : Disabled

Delay between Measurement : Disabled

| n    | Average   | Std.Dev.    | % RSD   | Maximum | Minimum |        |        |              |       |  |
|------|-----------|-------------|---------|---------|---------|--------|--------|--------------|-------|--|
| 5    | -115.20   | 1.30        | -1.12   | -113.00 | -116.00 |        |        |              |       |  |
| S.No | Sample ID | Time        | Result  | Scale   | OR °Arc | WLG.nm | Lg.mm  | Conc.g/100ml | Temp. |  |
| 1    | WJY67     | 05:38:50 PM | -113.00 | SR      | -0.113  | 589    | 100.00 | 0.100        | 24.2  |  |
| 2    | WJY67     | 05:38:57 PM | -115.00 | SR      | -0.115  | 589    | 100.00 | 0.100        | 24.2  |  |
| 3    | WJY67     | 05:39:03 PM | -116.00 | SR      | -0.116  | 589    | 100.00 | 0.100        | 24.1  |  |
| 4    | WJY67     | 05:39:09 PM | -116.00 | SR      | -0.116  | 589    | 100.00 | 0.100        | 24.1  |  |
| 5    | WJY67     | 05:39:18 PM | -116.00 | SR      | -0.116  | 589    | 100.00 | 0.100        | 24.1  |  |

Figure 4.1.8. Optical Rotation of compound 1

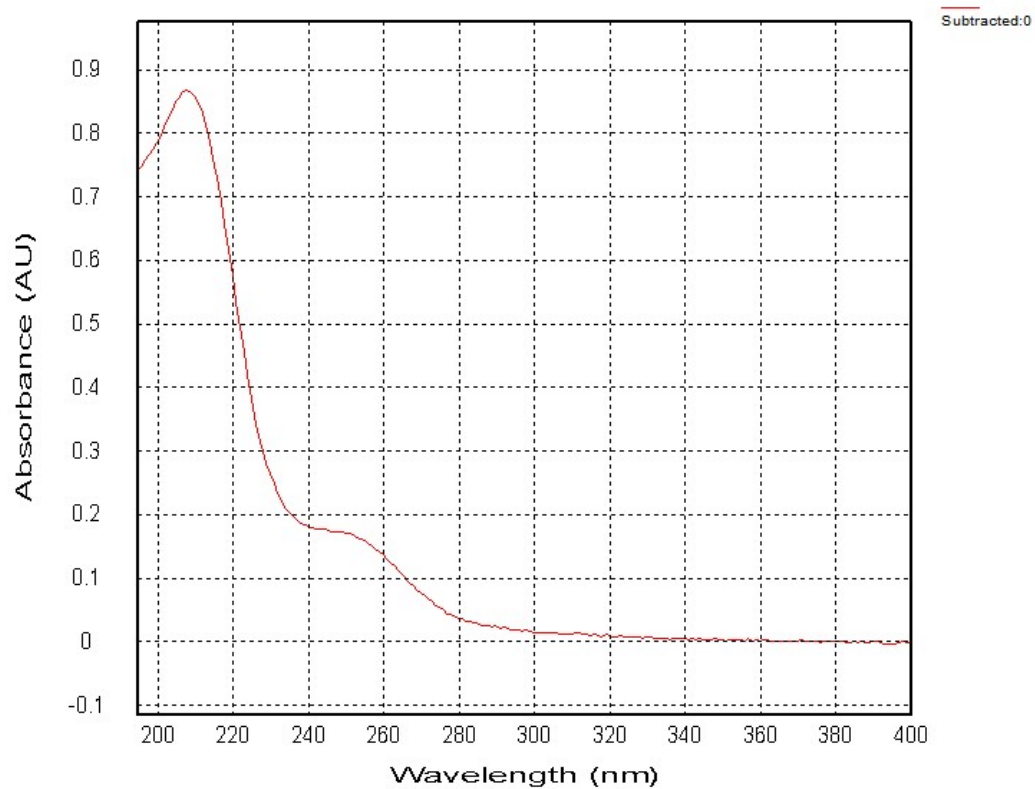

**Figure S4.1.9.** UV (MeOH) spectrum of **1**

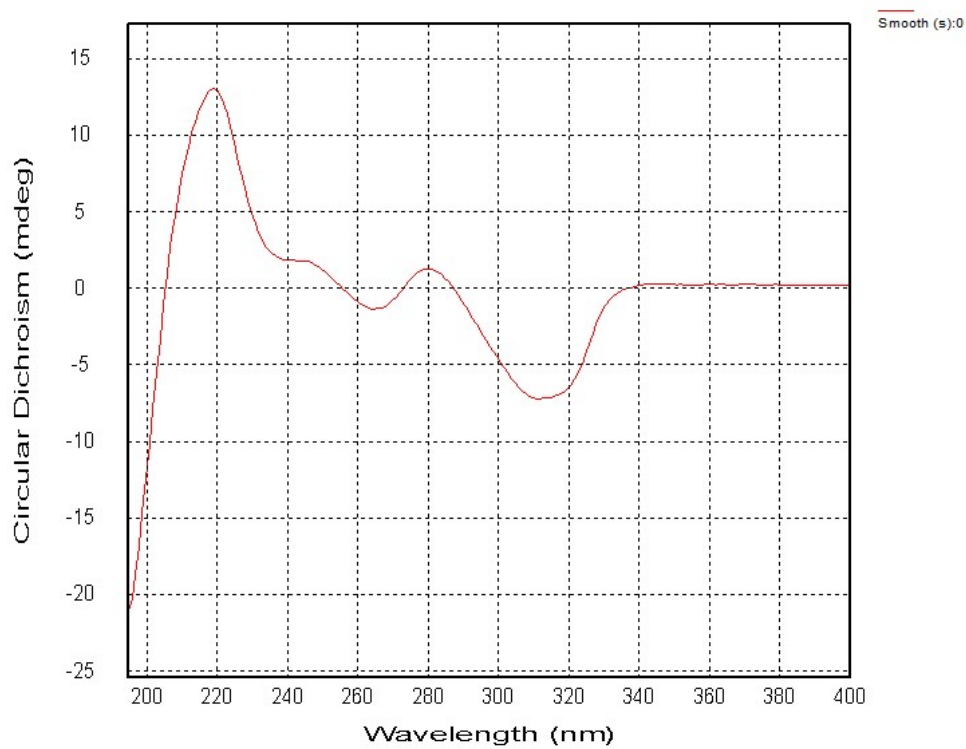

**Figure S4.1.10.** CD (MeOH) spectrum of **1**

## NMR, MS, ORD, UV and CD spectra of compound 2

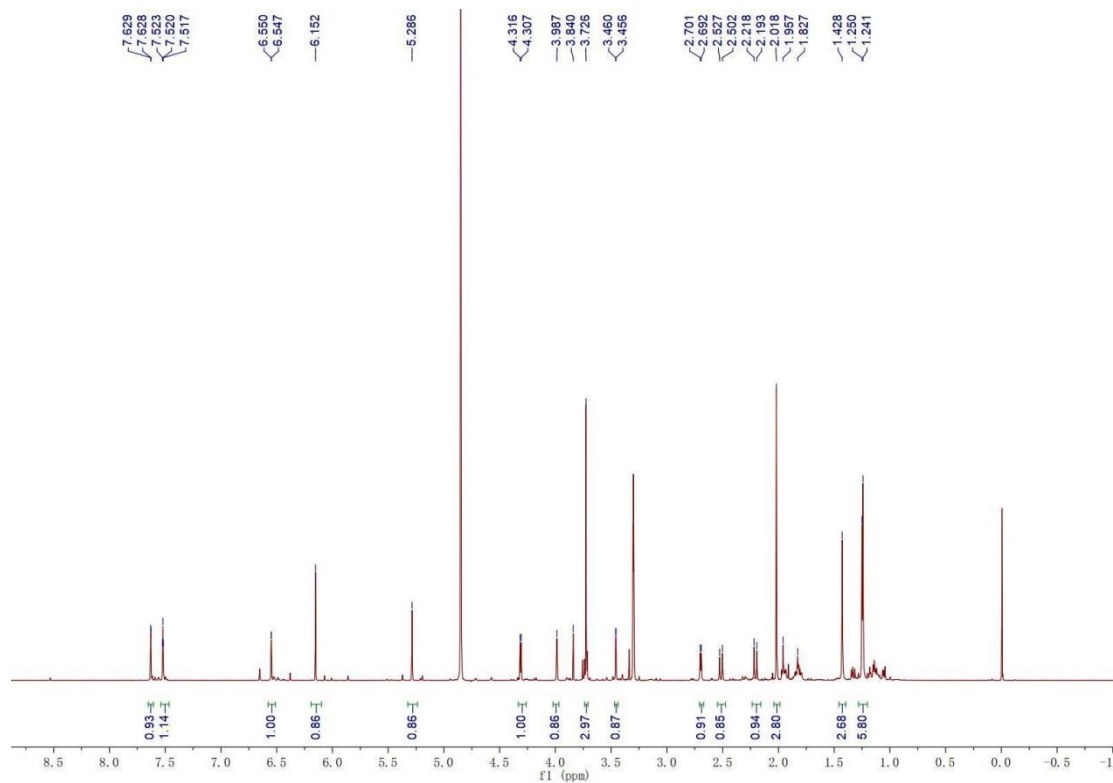

Figure 4.2.1. <sup>1</sup>H NMR spectrum of compound 2

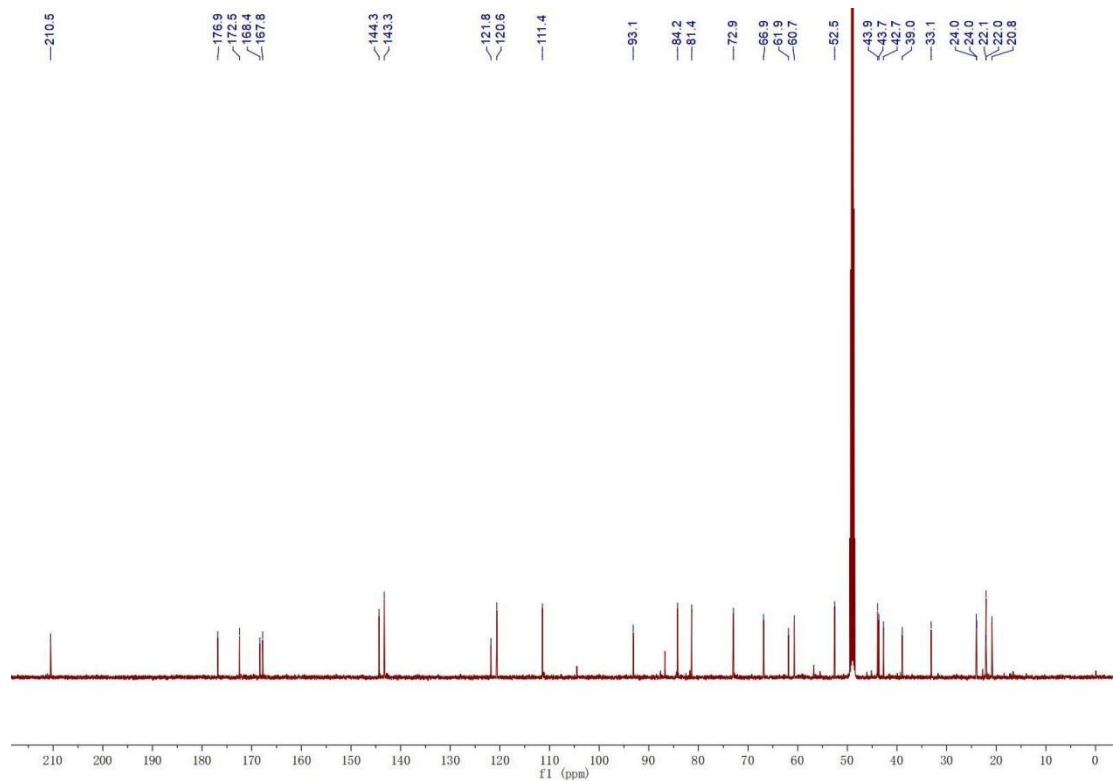

Figure 4.2.2. <sup>13</sup>C NMR spectrum of compound 2

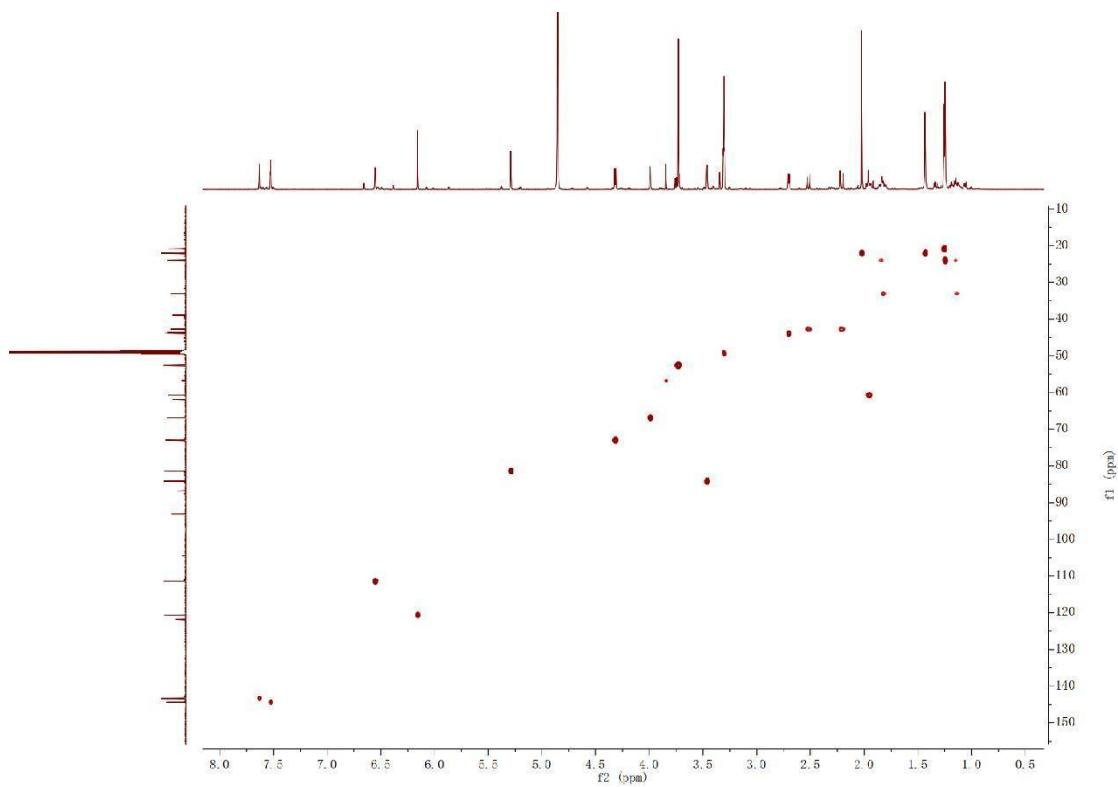

**Figure 4.2.3.** HSQC spectrum of compound **2**

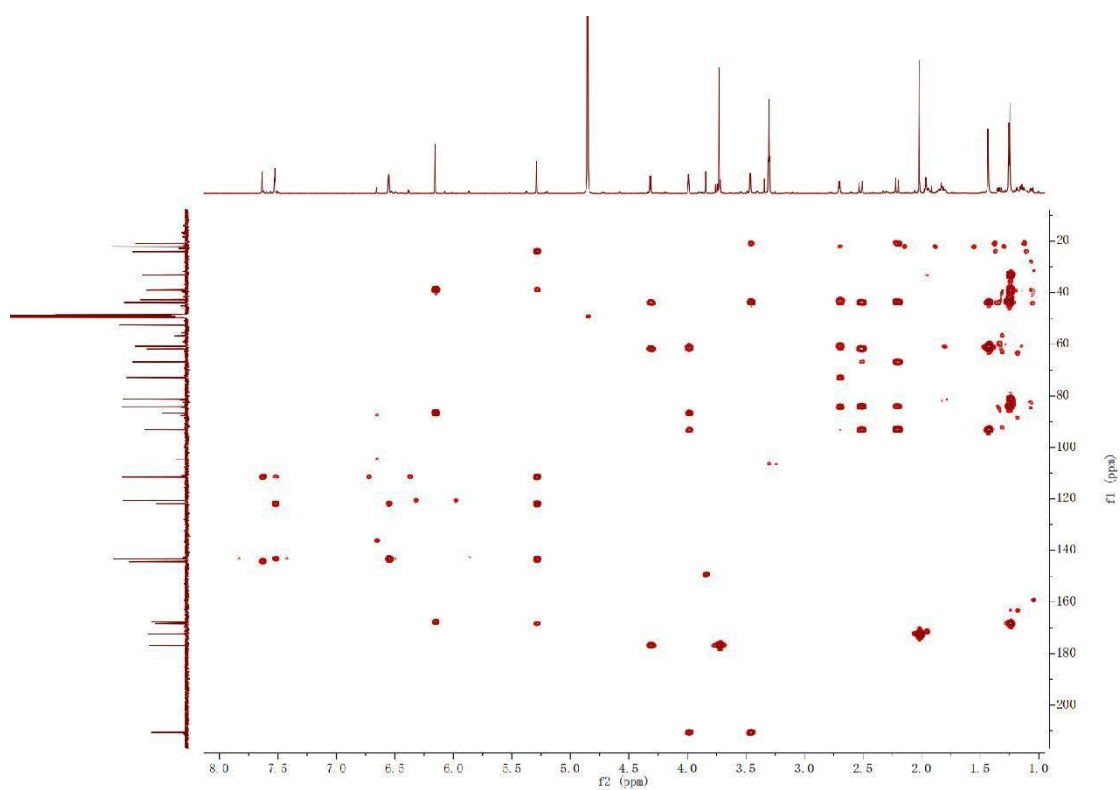

**Figure 4.2.4.** HMBC spectrum of compound **2**

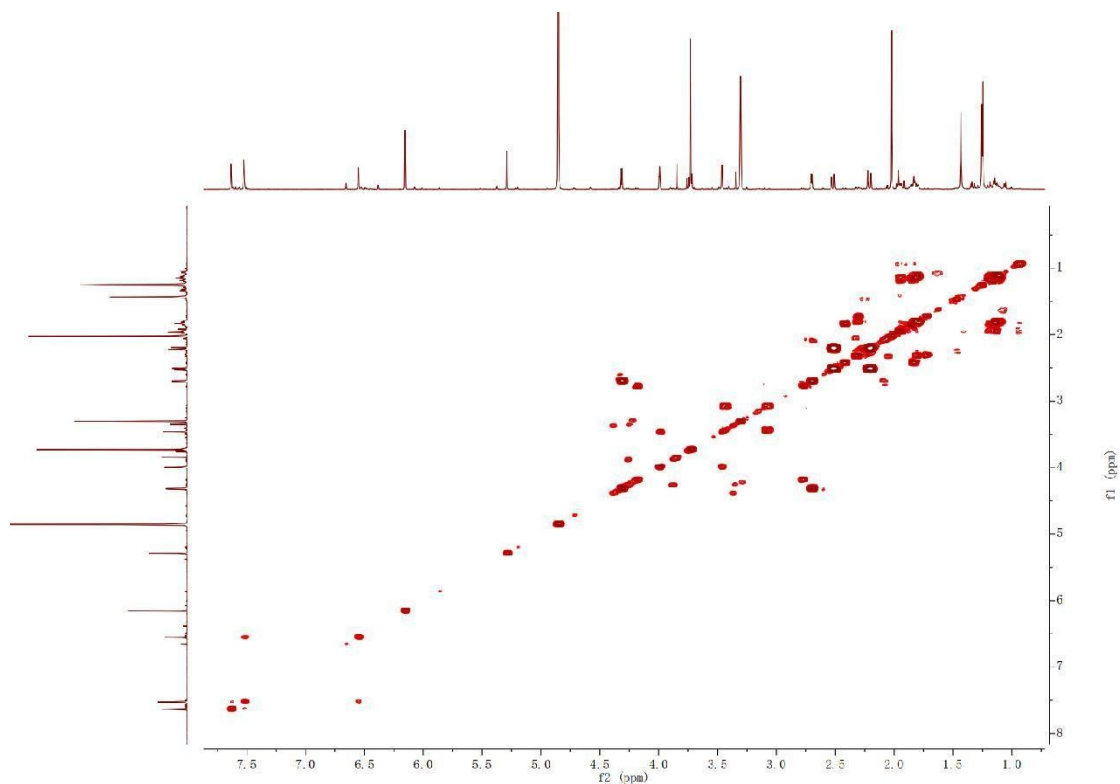

Figure 4.2.5.  $^1\text{H}$ - $^1\text{H}$  COSY spectrum of compound 2

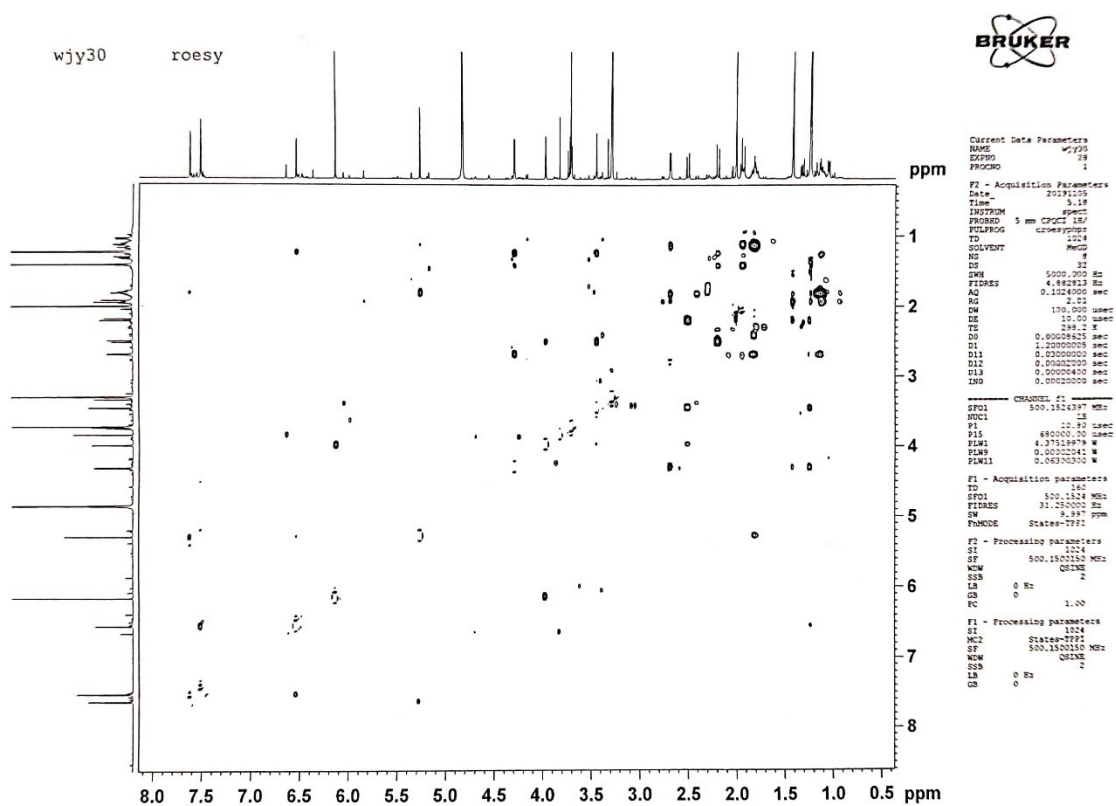

Figure 4.2.6. ROESY spectrum of compound 2



Data File: E:\DATA\2020\0701wjy-30.lcd

| Elmt | Val. | Min | Max | Use Adduct |
|------|------|-----|-----|------|------|-----|-----|------|------|-----|-----|------|------|-----|-----|------------|
| H    | 1    | 2   | 100 | F    | 1    | 0   | 0   | S    | 2    | 0   | 0   | Br   | 1    | 0   | 0   | Na         |
| 2H   | 1    | 0   | 0   | Na   | 1    | 0   | 0   | Cl   | 1    | 0   | 0   | Pd   | 2    | 0   | 0   |            |
| C    | 4    | 10  | 50  | Mg   | 2    | 0   | 0   | Co   | 2    | 0   | 0   | Ag   | 1    | 0   | 0   |            |
| N    | 3    | 0   | 10  | Si   | 4    | 0   | 0   | Cu   | 2    | 0   | 0   | I    | 3    | 0   | 0   |            |
| O    | 2    | 0   | 30  | P    | 3    | 0   | 0   | Se   | 2    | 0   | 0   |      |      |     |     |            |

Error Margin (ppm): 5  
 DBE Range: -2.0 - 100.0  
 Electron Ions: both  
 HC Ratio: unlimited  
 Apply N Rule: yes  
 Use MSn Infr: yes  
 Max Isotopes: all  
 Isotope RI (%): 1.00  
 Isotope Res: 10000  
 MSn Iso RI (%): 75.00  
 MSn Logic Mode: OR  
 Max Results: 10

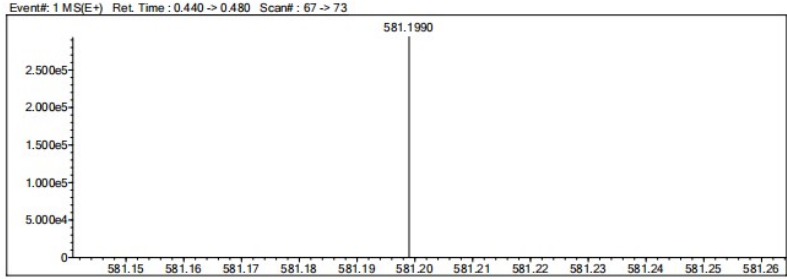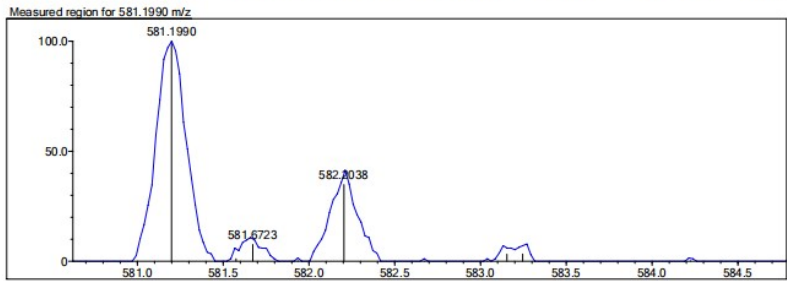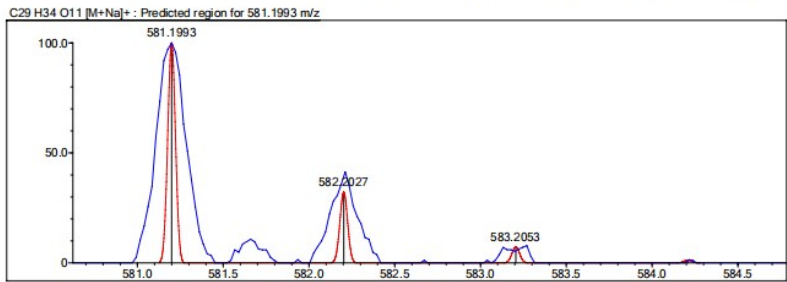

| Formula (M) | Ion                 | Meas. m/z | Pred. m/z | Df. (mDa) | Df. (ppm) | DBE  |
|-------------|---------------------|-----------|-----------|-----------|-----------|------|
| C29 H34 O11 | [M+Na] <sup>+</sup> | 581.1990  | 581.1993  | -0.3      | -0.52     | 13.0 |

Figure 4.2.7. HRESIMS spectrum of compound 2

**Rudolph Research Analytical**

This sample was measured on an Autopop VI, Serial #91058  
 Manufactured by Rudolph Research Analytical, Hackettstown, NJ, USA.

Measurement Date : Tuesday, 16-AUG-2022

Set Temperature : 25.0

Time Delay : Disabled

Delay between Measurement : Disabled

| n    | Average   | Std.Dev.    | % RSD  | Maximum | Minimum |        |        |              |       |  |
|------|-----------|-------------|--------|---------|---------|--------|--------|--------------|-------|--|
| 5    | 131.82    | 1.11        | 0.84   | 133.64  | 130.91  |        |        |              |       |  |
| S.No | Sample ID | Time        | Result | Scale   | OR °Arc | WLG.nm | Lg.mm  | Conc.g/100ml | Temp. |  |
| 1    | WJY30     | 07:00:23 PM | 133.64 | SR      | 0.147   | 589    | 100.00 | 0.110        | 25.0  |  |
| 2    | WJY30     | 07:00:29 PM | 131.82 | SR      | 0.145   | 589    | 100.00 | 0.110        | 25.0  |  |
| 3    | WJY30     | 07:00:35 PM | 131.82 | SR      | 0.145   | 589    | 100.00 | 0.110        | 25.0  |  |
| 4    | WJY30     | 07:00:42 PM | 130.91 | SR      | 0.144   | 589    | 100.00 | 0.110        | 25.0  |  |
| 5    | WJY30     | 07:00:48 PM | 130.91 | SR      | 0.144   | 589    | 100.00 | 0.110        | 25.0  |  |

Figure 4.2.8. Optical Rotation of compound 2

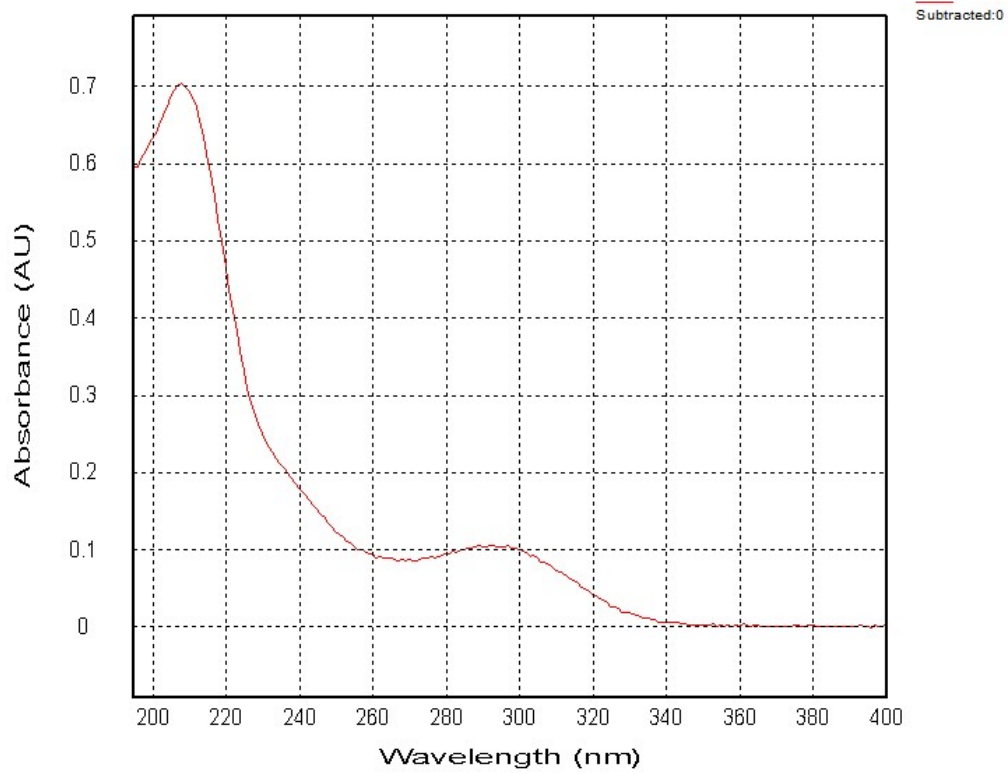

**Figure S4.2.9.** UV (MeOH) spectrum of **1**

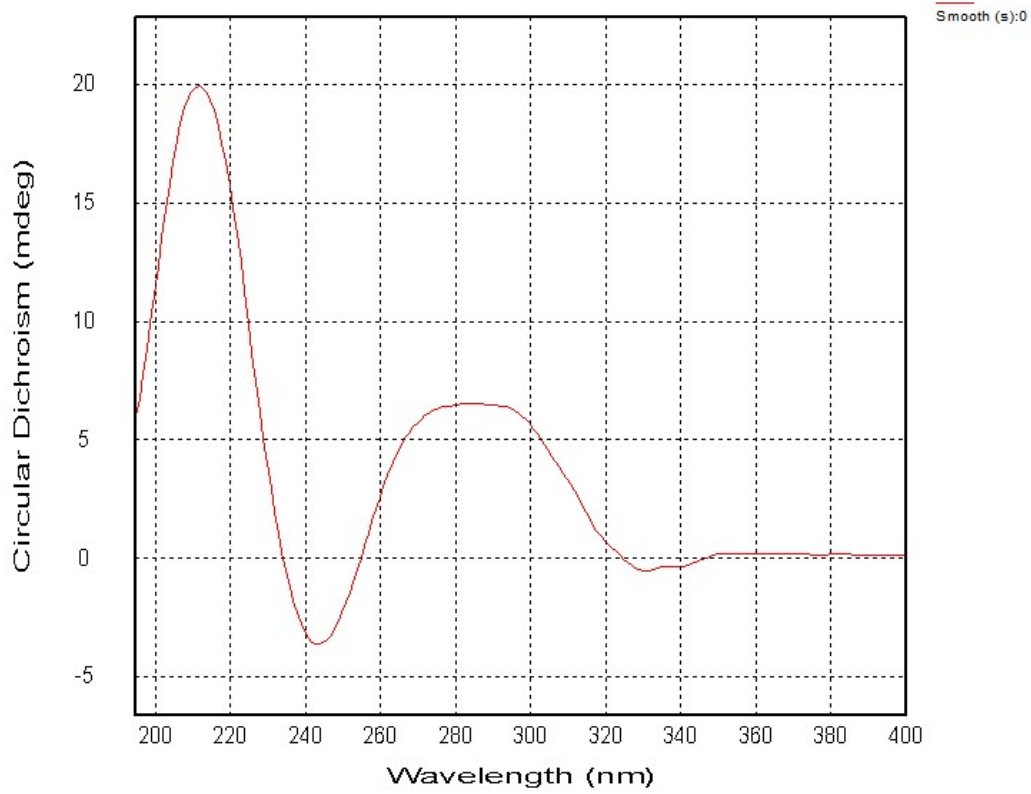

**Figure S4.2.10.** CD (MeOH) spectrum of **1**

### NMR, MS, ORD, UV and CD spectra of compound 3

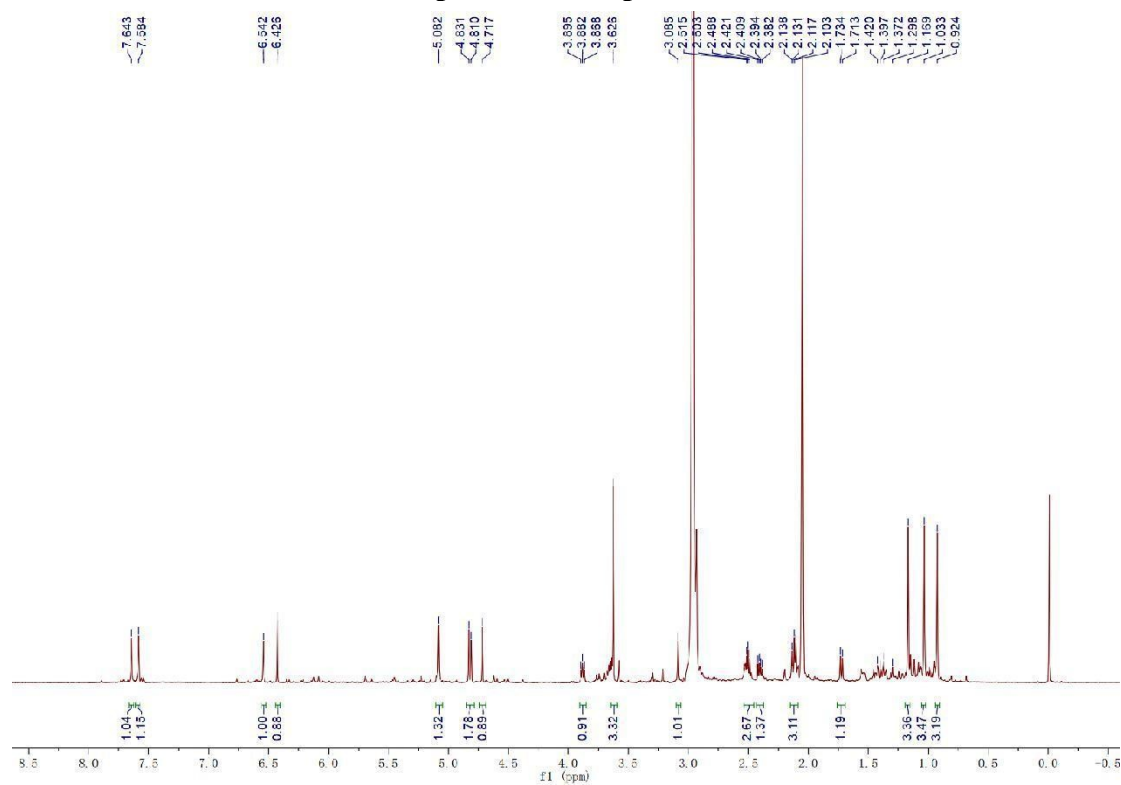

**Figure 4.3.1.**  $^1\text{H}$  NMR spectrum of compound 3 in  $\text{CD}_3\text{COCD}_3$

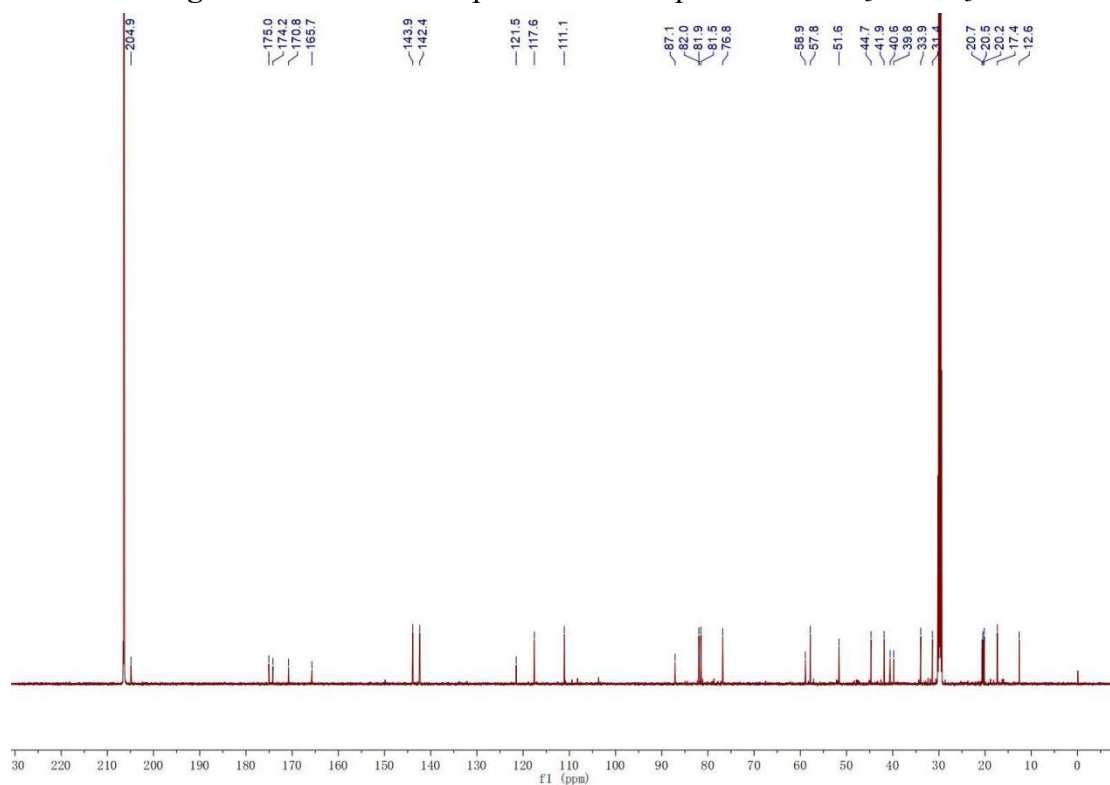

**Figure 4.3.2.**  $^{13}\text{C}$  NMR spectrum of compound 3 in  $\text{CD}_3\text{COCD}_3$

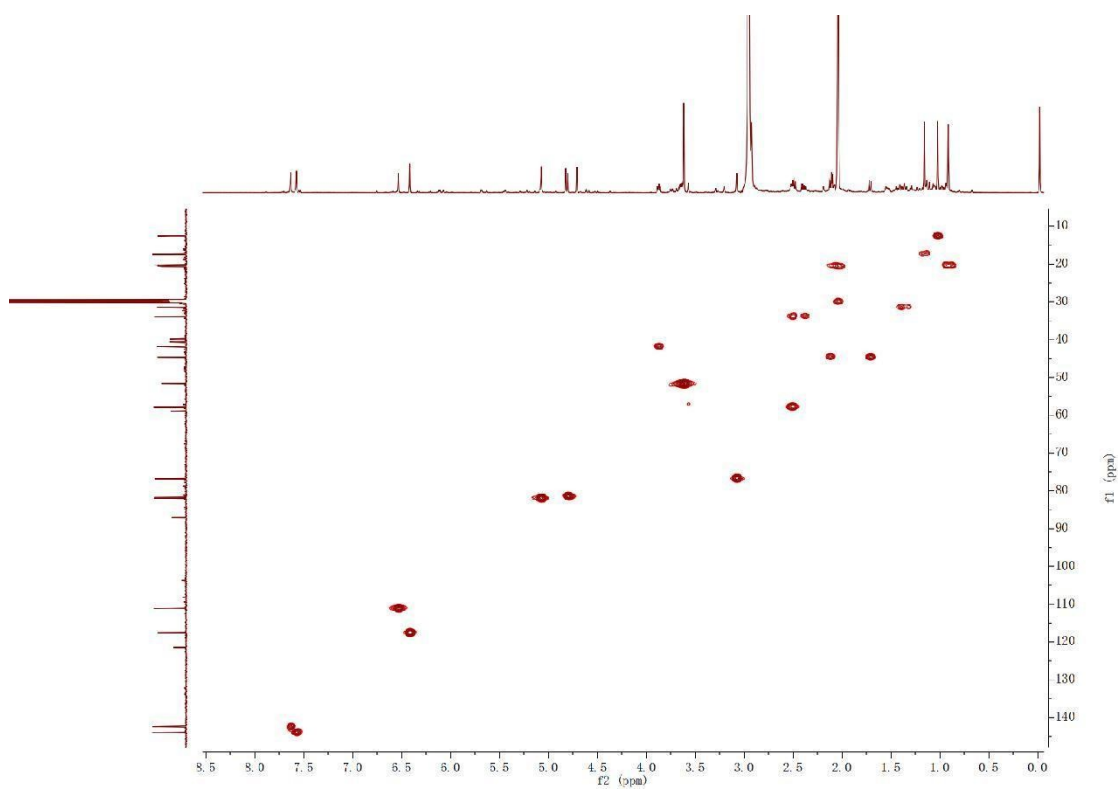

**Figure 4.3.3.** HSQC spectrum of compound **3** in  $\text{CD}_3\text{COCD}_3$

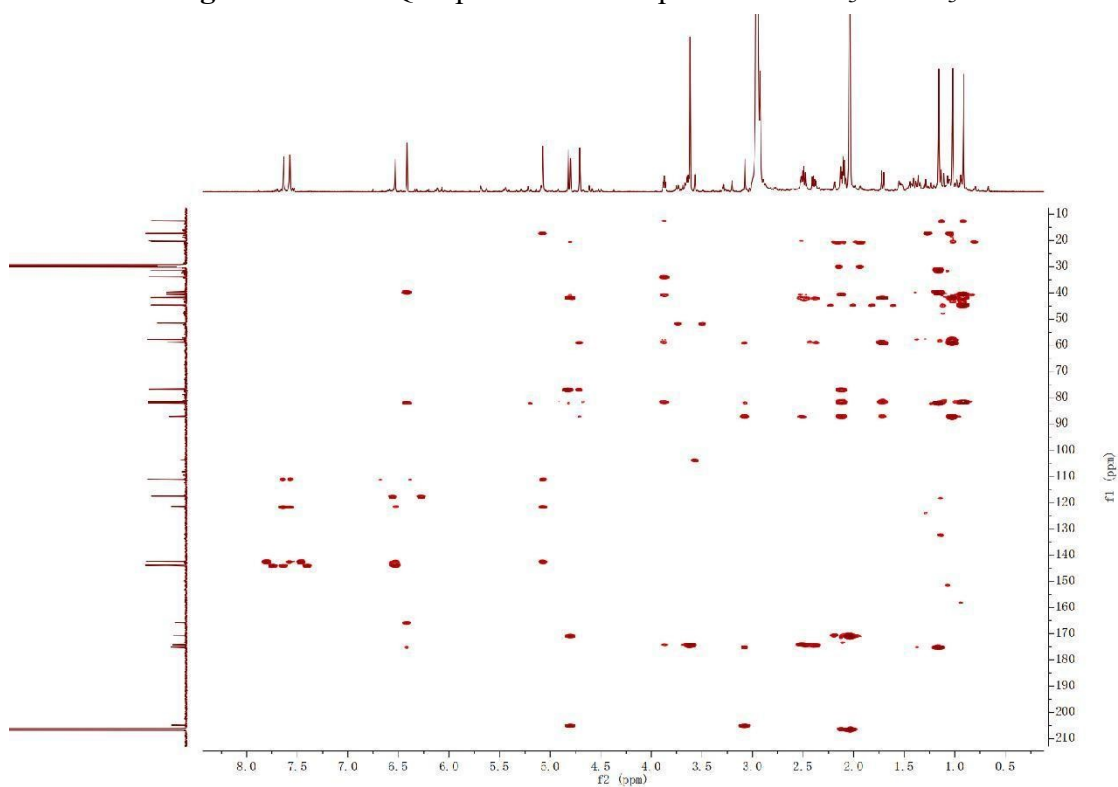

**Figure 4.3.4.** HMBC spectrum of compound **3** in  $\text{CD}_3\text{COCD}_3$

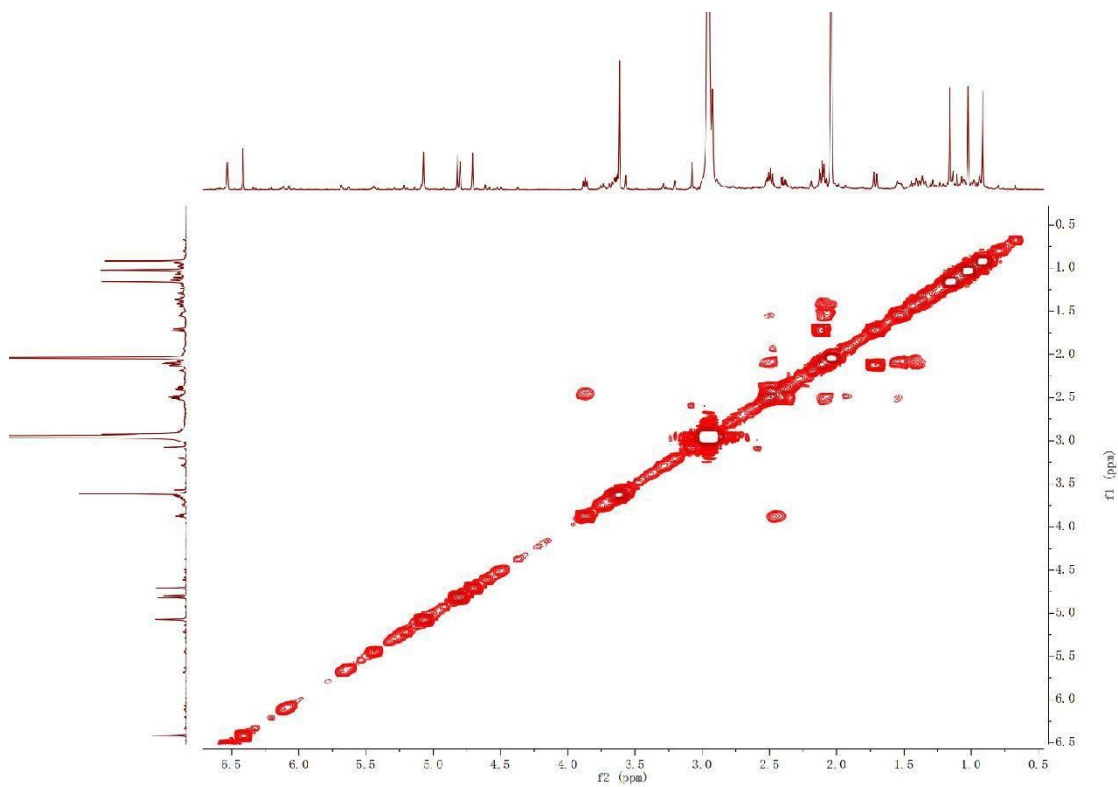

**Figure 4.3.5.**  $^1\text{H}$ - $^1\text{H}$  COSY spectrum of compound 3 in  $\text{CD}_3\text{COCD}_3$

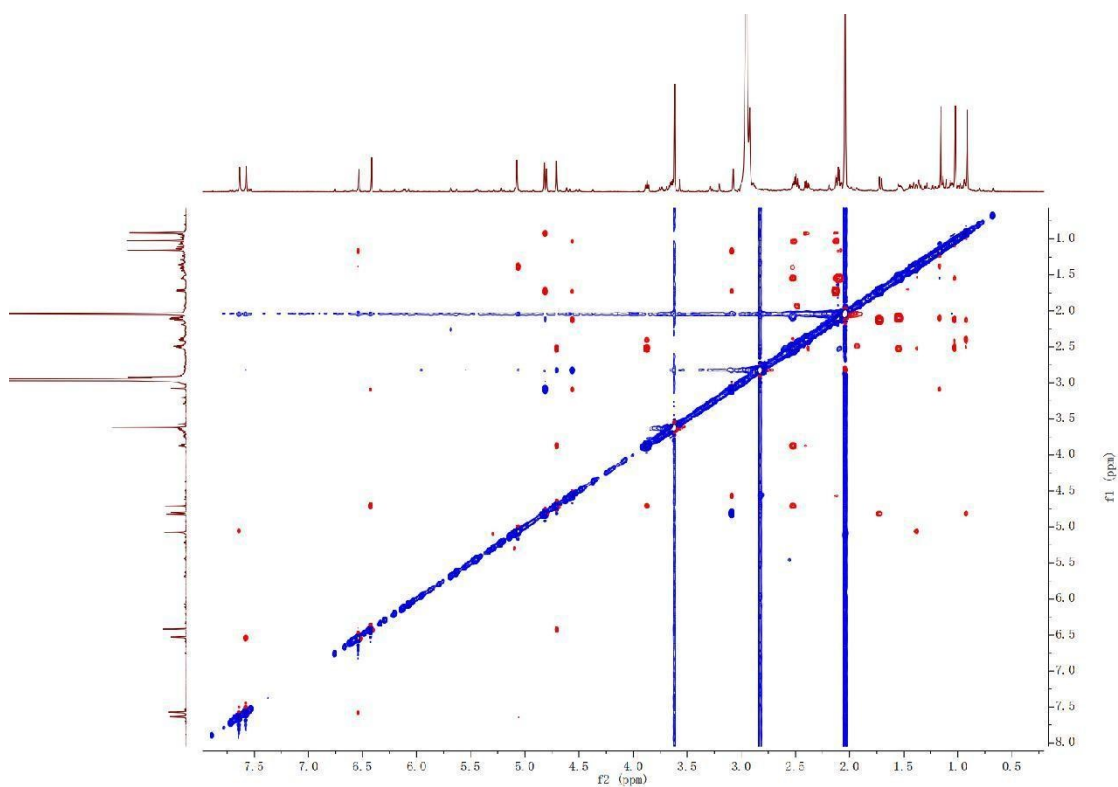

**Figure 4.3.6.** ROESY spectrum of compound 3 in  $\text{CD}_3\text{COCD}_3$

Data File: E:\DATA\2020\1209\wwj-53.lcd

| Elmt | Val. | Min | Max | Use Adduct |
|------|------|-----|-----|------|------|-----|-----|------|------|-----|-----|------|------|-----|-----|------------|
| H    | 1    | 10  | 100 | F    | 1    | 0   | 0   | S    | 2    | 0   | 0   | Br   | 1    | 0   | 0   | Na         |
| 2H   | 1    | 0   | 0   | Na   | 1    | 0   | 0   | Cl   | 1    | 0   | 0   | Pd   | 2    | 0   | 0   |            |
| C    | 4    | 10  | 50  | Mg   | 2    | 0   | 0   | Co   | 2    | 0   | 0   | Ag   | 1    | 0   | 0   |            |
| N    | 3    | 0   | 10  | Si   | 4    | 0   | 0   | Cu   | 2    | 0   | 0   | I    | 3    | 0   | 0   |            |
| O    | 2    | 0   | 30  | P    | 3    | 0   | 0   | Se   | 2    | 0   | 0   |      |      |     |     |            |

Error Margin (ppm): 5  
 DBE Range: -2.0 - 100.0  
 Electron Ions: both  
 HC Ratio: unlimited  
 Apply N Rule: yes  
 Use MSn Info: yes  
 Max Isotopes: all  
 Isotope RI (%): 1.00  
 MSn Iso RI (%): 75.00  
 MSn Logic Mode: OR  
 Isotope Res: 10000  
 Max Results: 20

Event#: 1 MS(E+) Ret. Time : 0.480 -&gt; 1.000 Scan#: 73 -&gt; 151

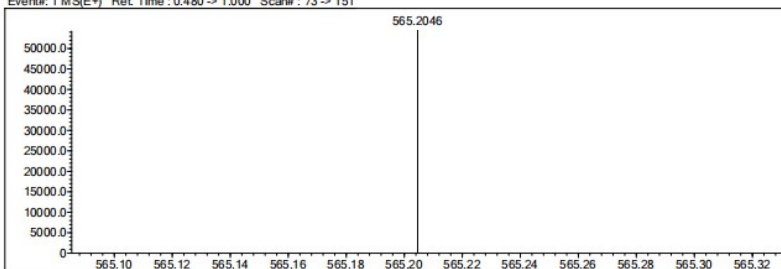

Measured region for 565.2046 m/z

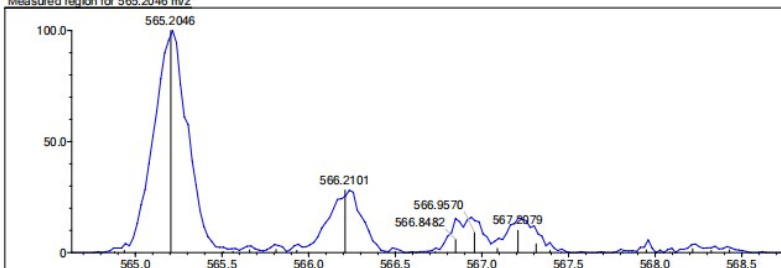

C29 H34 O10 [M+Na]+ : Predicted region for 565.2044 m/z

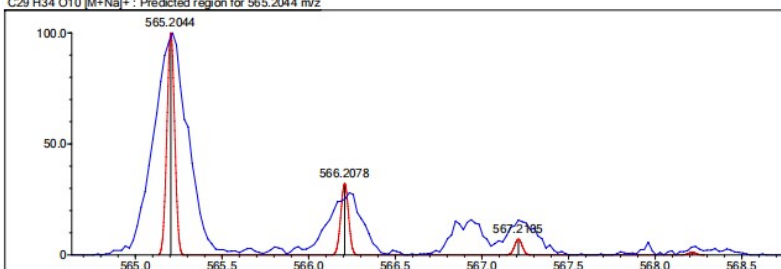

| Formula (M) | Ion     | Mess. m/z | Pred. m/z | Df. (mDa) | Df. (ppm) | DBE  |
|-------------|---------|-----------|-----------|-----------|-----------|------|
| C29 H34 O10 | [M+Na]+ | 565.2046  | 565.2044  | 0.2       | 0.35      | 13.0 |

Figure 4.3.7. HRESIMS spectrum of compound 3

**Rudolph Research Analytical**

This sample was measured on an Autopol VI, Serial #91058  
 Manufactured by Rudolph Research Analytical, Hackettstown, NJ, USA.

Measurement Date : Wednesday, 07-SEP-2022

Set Temperature : OFF

Time Delay : Disabled

Delay between Measurement : Disabled

| n    | Average   | Std.Dev.    | % RSD  | Maximum | Minimum |        |        |              |       |
|------|-----------|-------------|--------|---------|---------|--------|--------|--------------|-------|
| 5    | 89.80     | 1.10        | 1.22   | 91.00   | 89.00   |        |        |              |       |
| S.No | Sample ID | Time        | Result | Scale   | OR °Arc | WLG.nm | Lg.mm  | Conc.g/100ml | Temp. |
| 1    | WJY53     | 05:34:45 PM | 91.00  | SR      | 0.091   | 589    | 100.00 | 0.100        | 24.2  |
| 2    | WJY53     | 05:34:52 PM | 91.00  | SR      | 0.091   | 589    | 100.00 | 0.100        | 24.2  |
| 3    | WJY53     | 05:35:03 PM | 89.00  | SR      | 0.089   | 589    | 100.00 | 0.100        | 24.2  |
| 4    | WJY53     | 05:35:09 PM | 89.00  | SR      | 0.089   | 589    | 100.00 | 0.100        | 24.2  |
| 5    | WJY53     | 05:35:16 PM | 89.00  | SR      | 0.089   | 589    | 100.00 | 0.100        | 24.1  |

Figure 4.3.8. Optical Rotation of compound 3

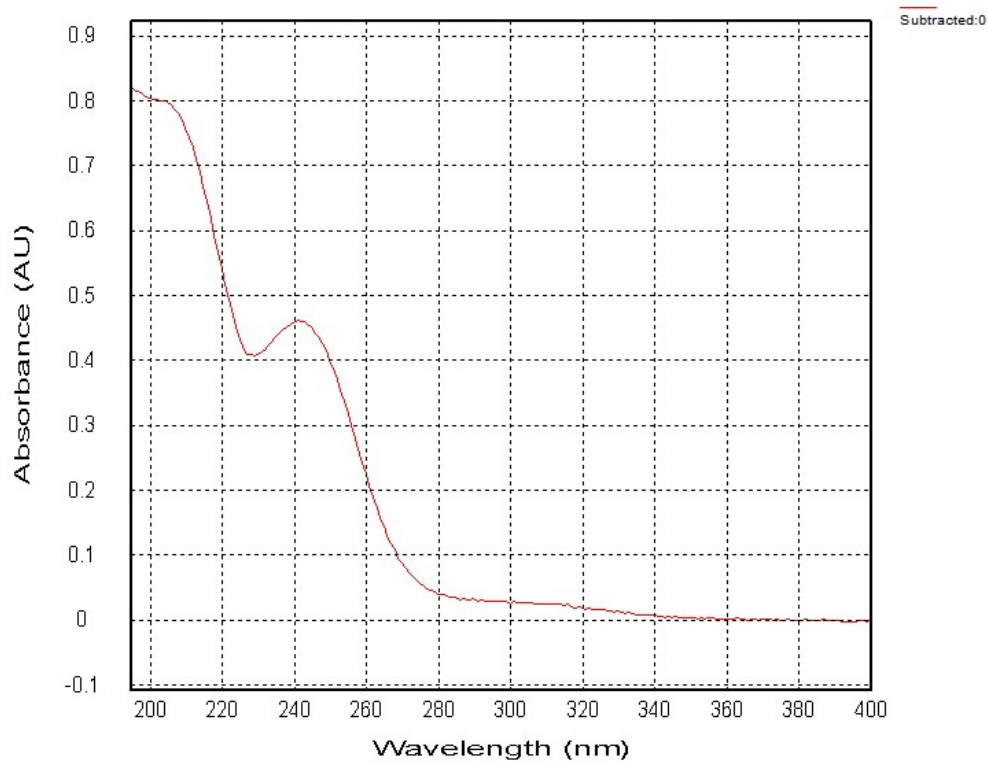

**Figure S4.3.9** UV (MeOH) spectrum of **3**

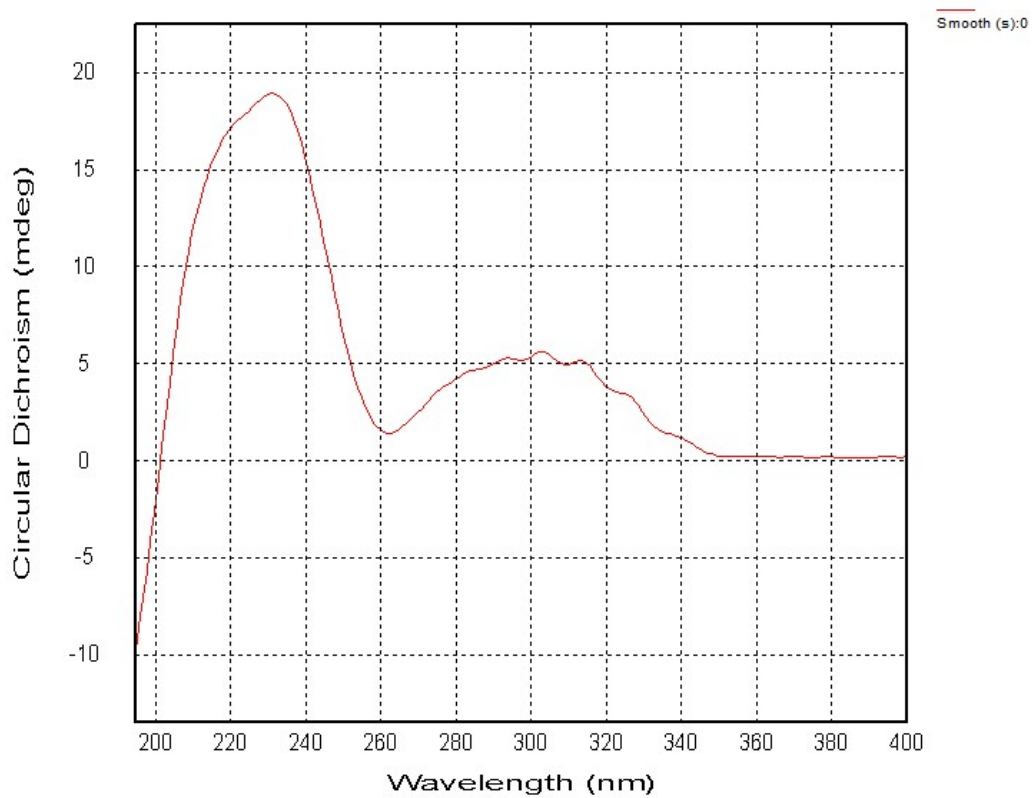

**Figure S4.3.10** CD (MeOH) spectrum of **3**
